26 evolution in spatially structured systems, and provide theoretical expectations for new empirical  
27 testing.

28 **Key words:** female multiple mating, dispersal, heterosis, deleterious recessive mutations,  
29 genetically explicit modelling

30

## 31 **Introduction**

32 Understanding evolution of life-histories and their consequences for populations' ecology and  
33 evolution ultimately requires recognizing the multiple interactions, such as feedbacks, tradeoffs,  
34 and shared drivers, existing among different strategies and between potentially competing  
35 resolutions of fitness costs. Although most often evolution of different traits is being treated  
36 separately, comprehensive understanding of how life-histories evolve under different  
37 environmental circumstances, including environmental changes, requires joint evolutionary  
38 dynamics to be elucidated. One prominent example is the evolution of competing mechanisms of  
39 inbreeding avoidance (Szulkin et al. 2013; Duthie et al. 2018), and specifically the potential for  
40 the joint evolution of dispersal and polyandry as competing responses to inbreeding depression,  
41 which could then feedback to shape the population's genetic load and consequent fitness. Yet,  
42 such joint evolutionary dynamics have not been examined, precluding comprehensive predictions  
43 of mating system evolution in spatially structured populations, as well as its genetic implications.

44 Inbreeding depression, defined as the reduction in fitness components of offspring of  
45 related individuals compared to offspring of unrelated individuals, is a widespread phenomenon  
46 that has profound demographic and evolutionary consequences (Keller and Waller 2002;  
47 Charlesworth and Willis 2009). It can reduce the mean fitness of a population and increase  
48 extinction risk (Theodorou and Couvet 2006; Hedrick and Garcia-Dorado 2016), and it can affect  
49 trait evolution (Lande and Schemske 1985; Charlesworth and Charlesworth 1987; Szulkin et al.

50 2013). Inbreeding depression is widely hypothesized to be a key driver of the evolution of two  
51 potential inbreeding avoidance mechanisms, dispersal and polyandry, which play a central role in  
52 populations' ecological and evolutionary dynamics, as they both shape gene flow within and  
53 between populations (Waser et al. 1986; Stockley et al. 1993; Perrin and Mazalov 1999; Jennions  
54 and Petrie 2000; Tregenza and Wedell 2002). Dispersal, that is any individual movement  
55 potentially leading to spatial gene flow (Ronce 2007; Clobert et al. 2012), shapes populations'  
56 spatiotemporal structure as well as their genetic structure, and the extent and direction of gene  
57 flow among populations (Clobert et al. 2012). Polyandry, defined as female mating with multiple  
58 males within a single reproductive bout (Pizzari and Wedell 2013; Taylor et al. 2014), has only  
59 more recently been recognized to have far reaching evolutionary and ecological consequences,  
60 and yet remains an evolutionary puzzle (Holman and Kokko 2013; Kvarnemo and Simmons 2013;  
61 Pizzari and Wedell 2013). In turn, both dispersal and polyandry can change the relatedness  
62 structure within and among populations, thus affecting opportunity for inbreeding and consequent  
63 evolution of inbreeding depression (Ronce 2007; Germain et al. 2018).

64         Despite inbreeding depression being a potential major shared driver, and despite the large  
65 amount of both theoretical and empirical work, evolution of dispersal and polyandry given  
66 inbreeding have been so far studied separately. Thus, we still do not know whether and how  
67 dispersal and polyandry affect each other's evolution, and how they may feed back onto evolution  
68 of inbreeding depression itself. Filling this knowledge gap is particularly important because  
69 populations exist in space and it is unlikely that major life-histories, such as dispersal and mating  
70 system, evolve independently (Ronce and Clobert 2012; Auld and Rubio de Casas 2013;  
71 Hargreaves and Eckert 2014). Further, ongoing environmental changes, such as habitat  
72 fragmentation and isolation, are fragmenting populations in smaller demes thus increasing the  
73 risk of inbreeding, and more generally demanding understanding of eco-(co-)evolutionary

74 dynamics of life-histories in highly structured systems (Hanski 2011; Cheptou et al. 2017; Legrand  
75 et al. 2017).

76 It is now accepted that inbreeding depression and heterosis (i.e., the increase in fitness in  
77 offspring originating from between populations crosses relative to offspring from within population  
78 crosses; Charlesworth and Charlesworth 1987; Whitlock et al. 2000; Charlesworth and Willis  
79 2009) can drive dispersal evolution, although debate remains on the form and the relative  
80 importance of this effect (Perrin and Goudet 2001; Ronce 2007; Szulkin and Sheldon 2008; Pike  
81 et al. 2021). Theoretical work has shown inbreeding depression and heterosis can results in  
82 substantial evolution of dispersal, which may be sex-biased or equal between the sexes  
83 depending on factors such as the cost of dispersal, the type and strength of same sex competition,  
84 the mating system, the strength of inbreeding depression and the presence of demographic and  
85 environmental stochasticity (Gandon 1999; Perrin and Mazalov 2000; Guillaume and Perrin 2006,  
86 2009; Roze and Rousset 2009; Henry et al. 2016; Li and Kokko 2019). Substantial insights have  
87 been achieved by theoretical models that consider the joint evolution of dispersal and inbreeding  
88 depression. These models do not assume constant inbreeding depression but explicitly model  
89 the accumulation and purging of deleterious recessive mutations responsible for inbreeding  
90 depression and genetic load more generally (Guillaume and Perrin 2006, 2009; Roze and  
91 Rousset 2009; Henry et al. 2016). Particularly, Roze and Rousset (2009) by using a continuous  
92 chromosome model, which allows modelling a potentially infinite number of deleterious recessive  
93 mutations, showed that heterosis can have a much more important effect (relative to kin  
94 competition) on dispersal evolution than previously thought (Guillaume and Perrin 2006; Ravigné  
95 et al. 2006), especially when population size is large and the genomic deleterious mutation rate  
96 is in the upper range of observed values. Further, the effect of heterosis increases when mutations  
97 become more recessive (Guillaume and Perrin 2006; Roze and Rousset 2009). However, even

98 studies that include a genetically explicit model of inbreeding depression, generally assume a  
99 fixed selection coefficient,  $s$ , and a dominance coefficient,  $h$ , across deleterious mutations. Thus,  
100 we still do not know how a more realistic distribution of deleterious mutations, which likely  
101 comprises many mutations with very small fitness effects and rare ones with larger effects (Eyre-  
102 Walker and Keightley 2007), and a negative relationship between selection and dominance  
103 coefficients (Agrawal and Whitlock 2011; Huber et al. 2018), might impact on evolving inbreeding  
104 depression, and the consequent evolution of dispersal and mating systems (Porcher and Lande  
105 2016).

106         Meanwhile, explaining the evolution and persistence of polyandry is an ongoing pursuit in  
107 evolutionary biology, that is especially challenging when there is direct selection against it, that is  
108 when polyandry is costly to females (Arnqvist and Nilsson 2000; Jennions and Petrie 2000;  
109 Slatyer et al. 2012; Parker and Birkhead 2013). Although the hypothesis that inbreeding  
110 depression can drive the evolution of female multiple mating is prominent among the different  
111 evolutionary mechanisms that have been postulated, it remains less established in its theoretical  
112 and empirical demonstration, compared to dispersal (Stockley et al. 1993; Jennions and Petrie  
113 2000; Tregenza and Wedell 2002; Reid and Sardell 2012; Reid et al. 2015; Duthie et al. 2016;  
114 Germain et al. 2018). Polyandry has been hypothesized to evolve as a mechanism for inbreeding  
115 avoidance through two main routes: direct or indirect inbreeding avoidance (Germain et al. 2018).  
116 Female multiple mating could evolve because it facilitates inbreeding avoidance through female  
117 active pre- and/or post-copulatory allocation of paternity to less closely related males, hence  
118 directly reducing inbreeding depression in offspring viability (direct inbreeding avoidance)  
119 (Jennions and Petrie 2000; Tregenza and Wedell 2002; Duthie et al. 2016, 2018). Alternatively,  
120 without invoking active mate choice and kin recognition, polyandry could evolve because it alters  
121 relatedness among the female's offspring, producing more half-sibs rather than full-sibs, thereby

122 reducing the risk of close inbreeding for the offspring of a polyandrous female and reducing  
123 inbreeding depression in her grand offspring (indirect inbreeding avoidance) (Cornell and  
124 Tregenza 2007; Germain et al. 2018). The few theoretical models to have investigated these  
125 verbal predictions (Cornell and Tregenza 2007; Duthie et al. 2016, 2018) have generally  
126 concluded that the strength of indirect selection on polyandry through inbreeding avoidance might  
127 be very small, thereby suggesting a minor role of inbreeding depression in polyandry evolution.

128         Specifically, Cornell and Tregenza (Cornell and Tregenza 2007) concluded that purging  
129 of deleterious recessive mutations makes it unlikely to maintain sufficient levels of inbreeding  
130 depression to favor costly polyandry, and that the evolution of polyandry as a mechanism of  
131 indirect inbreeding avoidance is far more likely if inbreeding depression was due to  
132 overdominance. This poses a problem because current understanding suggests that inbreeding  
133 depression is predominantly caused by deleterious recessive, rather than overdominant,  
134 mutations (Charlesworth and Willis 2009). However, Cornell and Tregenza's (2007) model makes  
135 some assumptions that preclude assessing whether such a mechanism could generally drive  
136 polyandry evolution in spatially structured populations. The model considers alternating  
137 generations of outbreeding and inbreeding, which is particularly relevant to some invertebrate  
138 groups where mated females cyclically colonize empty patches, thus experiencing cyclical  
139 changes in inbreeding risk (e.g., store product pest species such as flour beetles, *Tribolium* spp.).  
140 However, this does not apply to species with more regular inbreeding as it does not consider the  
141 building up of complex relatedness structure within a population, that arise across multiple  
142 generations and might weaken the selective advantage of polyandry (Germain et al. 2018).  
143 Indeed, Cornell and Tregenza's (Cornell and Tregenza 2007) pointed out that higher levels of  
144 inbreeding, as we might expect in spatially structured populations, might favor polyandry, although  
145 this might be offset by greater purging of deleterious recessives alleles. No model so far has

146 investigated the evolution of polyandry as a mechanism of indirect inbreeding avoidance in  
147 populations that are spatially structured and connected by dispersal, nor has considered an  
148 explicit model of inbreeding depression with realistic distributions of the fitness effects and  
149 dominance coefficients of deleterious mutations, thus leaving a substantial knowledge gap.

150       Beyond the unknowns that are still present in the separate theories of dispersal and  
151 polyandry evolution given inbreeding depression, we do not know how these two potential  
152 mechanisms of inbreeding avoidance might affect each other's evolution, and feed back onto  
153 evolution of inbreeding depression. I hypothesize a negative feedback between dispersal and  
154 polyandry, whereby the evolution of polyandry might reduce inbreeding and hence reduce the  
155 strength of selection for dispersal and, *vice versa*, the presence of high dispersal might weaken  
156 selection for polyandry. The outcome of this tug-o-war will likely depend on the relative efficiency  
157 of dispersal and polyandry in reducing inbreeding, with the expectation that dispersal would be  
158 much more effective, on the level of inbreeding load, and on the strength of direct selection against  
159 them, that is on the cost of dispersal and polyandry.

160       I investigate this hypothesis with a modelling framework that allows joint evolution of  
161 dispersal and polyandry in spatially structured populations and, at the same time, explicit  
162 accumulation of deleterious mutations and evolution of inbreeding depression. Specifically,  
163 inbreeding depression is determined by accumulation of a potentially infinite number of  
164 deleterious recessive mutations with a realistic distribution of fitness effects and dominance  
165 coefficients. First, I test whether existing predictions on the independent evolution of dispersal  
166 and polyandry hold in spatially structured populations given an explicit model of inbreeding and  
167 inbreeding depression evolution, and how their evolution affects inbreeding depression. Second,  
168 I test the novel hypothesis of a negative feedback between jointly evolving dispersal and  
169 polyandry and, third, determine their joint effect on the evolution of inbreeding depression. More

170 generally, I show the value of moving towards theoretical frameworks that explicitly integrate  
171 ecology, genetics, and evolution, to progress our understanding of life-history evolution and its  
172 impacts on populations.

## 173 **The Model**

174 To investigate the joint evolution of dispersal and polyandry given inbreeding depression I built a  
175 spatially and genetically explicit individual-based model where emigration probability ( $d$ ) and  
176 female re-mating rate ( $a$ ) evolve. Genetic load and resulting inbreeding depression (ID) also  
177 evolve by accumulation and purging of deleterious recessive mutations. Populations of a  
178 dioecious species, with non-overlapping generations, occupy cells within a landscape grid of 20  
179 by 20 cells, and are connected by dispersal. The environment is spatially homogeneous and  
180 temporally constant; each cell is suitable to hold a population with constant carrying capacity  $K =$   
181 50. All the model variables and parameters are listed in Table S1.

182 ***Genetic architecture and inbreeding depression.*** To model the genetic basis of  $d$  and  $a$ ,  
183 individuals carry two unlinked diploid loci with a continuous distribution of alleles (Kimura 1965).  
184 The initial value of each allele is sampled from normal distributions. Alleles can mutate with  
185 probability  $\mu = 10^{-3}/\text{allele/generation}$ . When a mutation occurs a random normal deviate with mean  
186 zero is added to the allele value. The individual's genotypic values for the two traits,  $g_d$  and  $g_a$ ,  
187 are given by the sum of the two allelic values at the respective loci. The phenotypic expression  
188 has no environmental variance and is female limited for  $a$ . I assume the phenotypes  $a \geq 0$  and  $0$   
189  $\leq d \leq 1$ .

190 ID is determined by deleterious recessive mutations (Charlesworth and Willis 2009) which  
191 accumulate on a continuous chromosome (Roze and Rousset 2009). Each individual carries two  
192 homologous autosomes of length  $R$  (genome map length). The position of each new deleterious



193 mutation on the chromosome is sampled from the continuous uniform distribution  $U[0, R]$ . The  
194 number of loci at which mutations can occur is therefore effectively infinite (“infinite site model”  
195 (Peischl et al. 2015)). Each new mutation is characterized by a selection coefficient  $s$ , determining  
196 the mutation’s effect in the homozygous state, and a dominance coefficient  $h$ . The effect of each  
197 mutation  $i$  is multiplicative such that the genetic fitness  $\omega$  of an individual is given by

$$198 \quad \omega = \prod_{N_{het}} (1 - h_i s_i) \prod_{N_{hom}} (1 - s_i) \quad [1]$$

199  $N_{het}$  and  $N_{hom}$  represent the number of heterozygous and homozygous mutations respectively.  
200 Deleterious mutations are of two types: mildly deleterious and lethal (Gilbert et al. 2017; Spigler  
201 et al. 2017). Mildly deleterious mutations occur at a rate  $U_d = 1.0/\text{diploid genome/generation}$   
202 (Haag-Liautard et al. 2007; Zhu et al. 2014). The selection coefficient of each new mutation is  
203 sampled from a gamma distribution with mean  $s_d = 0.05$  and shape parameter  $\alpha = 1$  (Schultz and  
204 Lynch 1997; Spigler et al. 2017). The dominance coefficient of a mutation  $i$  depends on its  
205 selection coefficient  $s_i$  and is sampled from the continuous uniform distribution  $U[0.0, e^{-k s_i}]$ .  $k$  is  
206 defined as  $-\log(2h_d)/s_d$ , where  $h_d$  is the mean dominance coefficient ( $h_d = 0.3$ ) (Caballero and  
207 Keightley 1994; Spigler et al. 2017). Lethal mutations occur at rate  $U_l = 0.2/\text{diploid}$   
208 genome/generation and are extremely recessive, with constant selection coefficient  $s_l = 1$  and  
209 dominance coefficient  $h_l = 0.02$  (Simmons and Crow 1977; Lande et al. 1994; Porcher and Lande  
210 2005; Spigler et al. 2017). At each generation, the number of new mutations per diploid genome  
211 is sampled from Poisson distributions with parameters  $U_d$  and  $U_l$ . The number of crossovers along  
212 the continuous chromosomes is sampled from a Poisson distribution with mean  $R$ , and the  
213 position of each crossover is sampled from the uniform distribution  $U[0, R]$ .

214 Individuals also carry  $L_n = 500$  neutral autosomal diploid loci to determine the degree to  
215 which individuals are inbred (Bocedi and Reid 2017). Neutral allelic values are continuously  
216 distributed, sampled from the uniform distribution  $U[-1000.0, 1000.0]$ , and mutate with  
217 probability  $10^{-3}$  /allele/generation. Neutral loci recombine at rate  $r = 0.1$ . Alleles at the same locus  
218 will be identical only by descent as the chance of non-descent identity by state, stemming from  
219 initialization or mutation, is negligible. For this reason, individual's neutral homozygosity, defined  
220 as the number of neutral homozygous loci /  $L_n$ , represents a proxy for the realized individual  
221 coefficient of inbreeding, hereafter noted as  $F_{homozy}$  (Markert et al. 2004; Neff and Pitcher 2008;  
222 Fromhage et al. 2009; Bocedi and Reid 2017). When an individual is born, it is assumed to die  
223 immediately if its genetic fitness  $\omega = 0$ . If  $\omega > 0$ , the newborn survives to adulthood (unless it  
224 incurs in dispersal mortality, see below) when  $\omega$  will determine its probability of reproducing. Thus,  
225 ID is affecting two fitness components: 1) reduction in offspring survival, which is determined by  
226 the presence of homozygous lethal mutations, and 2) reduction in adult probability of reproducing,  
227 which is determined mainly by mildly deleterious mutations.

228 The level of ID present in a metapopulation at a given point in time, was calculated as: 1)  
229 effect of  $F_{homozy}$  on offspring survival by fitting a generalized linear model with Poisson distribution  
230 and logarithmic link function (Nietlisbach et al. 2019); 2) effect of  $F_{homozy}$  on the logarithm of adult  
231 reproduction probability by fitting a linear model (Morton et al. 1956). All models were fitted in R  
232 (R Core Team 2019). To obtain a spread of  $F_{homozy}$  values to estimate ID, I created individuals by  
233 selecting the central 140 populations in the landscape (out of 400 populations) at a given point in  
234 time. For each of these populations, I mated each female with 10 males selected randomly within  
235 the female's population and with 10 males selected randomly between different populations. Each  
236 mating produced one offspring. Models were then fitted on all the offspring pooled together. These  
237 individuals were also used to calculate the level of heterosis (H) in each population as  $H = 1 -$

238  $\omega_w/\omega_b$ , where  $\omega_w$  is the genetic fitness of offspring produced within populations, and  $\omega_b$  is the  
239 genetic fitness of offspring produced between populations (e.g., Roze and Rousset 2009). All the  
240 offspring produced this way were used only for estimating ID and H, and then discarded, thus  
241 were not part of the ecological and evolutionary dynamics.

242 **Life cycle and selection.** At each generation, the life cycle consists of reproduction (mating and  
243 offspring birth), adults' death and death of offspring with  $\omega = 0$ , offspring dispersal and density-  
244 dependent survival. An adult's probability of reproducing is given by its genetic fitness  $\omega$ . Each  
245 reproducing female  $i$  mates initially once, and then re-mates with probability  $Pmat_i$  depending on  
246 her re-mating rate phenotype  $a_i$  and on her current number of mates  $Nm_i$ :

$$247 \quad Pmat_i = e^{-a_i Nm_i} \quad [2]$$

248 Each mate is randomly sampled among the reproducing males in the female's population, without  
249 replacement. If the female has already mated once with all the reproducing males in the  
250 population, she stops re-mating. Mating multiply can be costly to females. The probability that a  
251 female  $i$  survives to reproduction ( $\psi_i$ ) depends on her total number of mates  $Nmates_i$  and on the  
252 strength of selection against multiple mating  $\omega_m^2$ :

$$253 \quad \psi_i = e^{-\frac{(1-Nmates_i)^2}{2\omega_m^2}} \quad [3]$$

254 If the female survives mating, she produces a number of offspring sampled from a Poisson  
255 distribution with mean  $f = 12$  and primary sex-ratio = 1:1. Each offspring is sired by a male  
256 randomly chosen, with replacement, between the female's mates.

257 After reproduction, all adults die, and offspring may disperse among sub-populations  
258 according to their emigration probability phenotype  $d$ . Dispersal distance and direction are

259 sampled from a negative exponential distribution (mean 2 cells), and uniform distribution between  
260 0 and  $2\pi$ , respectively. The new location is re-sampled if it falls outside the grid. Dispersal has a  
261 cost,  $c_d$ , representing the probability of an individual dying during dispersal. After dispersal,  
262 density-dependent survival takes place in each population. Individuals survive with probability  
263  $\min(K/N, 1)$ , where  $N$  is the total number of individuals in the population.

264 **Simulations.** I ran three main sets of simulations. 1) Only dispersal is evolving while female re-  
265 mating rate is constant,  $a = 3$  (corresponding to 1.3 mates per female on average – hereafter  
266 defined as monandry); 2) only female re-mating rate is evolving while dispersal is constant,  $d =$   
267 0.05; 3) both dispersal and female re-mating rate are evolving. All simulations were run under  
268 varying costs of dispersal and female re-mating and repeated in the absence of deleterious  
269 mutations (and hence ID) as control. I additionally tested the effect of varying the rates of  
270 deleterious mutation ( $U_d = 0.5$  and  $U_l = 0.1$ ;  $U_d = 0.1$  and  $U_l = 0.02$ ).

## 271 **Results and Discussion**

272 **Evolution of dispersal and inbreeding depression given monandry.** Under fixed monandry  
273 conditions, emigration probability  $d$  evolved in response to the presence of deleterious recessive  
274 mutations and consequent inbreeding depression (ID), reaching higher values the lower the cost  
275 of dispersal ( $c_d$ ; Fig. 1A). Much higher emigration probability evolved in the presence than in the  
276 absence of genetic load when, given the spatio-temporally homogeneous environment, the only  
277 driver of dispersal evolution was kin competition. For example, at the lower cost considered ( $c_d =$   
278 0.3),  $d$  evolved almost eight times higher with ID [median  $\bar{d} = 0.41$  (95%CI 0.401-0.414), where  
279  $\bar{d}$  represents the mean phenotypic value for one replicate metapopulation; median and CI are  
280 taken across 20 replicates] than without ID [median  $\bar{d} = 0.05$  (95%CI 0.05-0.054)]; while it was  
281 almost seven times higher at high cost of dispersal [ $c_d = 0.6$ ; median  $\bar{d} = 0.15$  (95%CI 0.15-

282 0.157) with ID vs. median  $\bar{d} = 0.02$  (95%CI 0.02-0.023) without ID]. Results remained qualitatively  
283 similar under lower rates of deleterious mutations, although the lower the mutation rate the lower  
284 the evolved dispersal probability (Fig. S1A-S2A). The level of heterosis  $H$  reached at equilibrium  
285 depended on the level of evolved dispersal, and hence on dispersal cost (Fig. S3A). Higher cost  
286 of dispersal led to lower dispersal and to populations being less homogeneous in terms of their  
287 genetic load, and hence to higher heterosis. Higher rates of deleterious mutations, by causing  
288 accumulation of higher genetic load, led to the emergence of higher heterosis compared to lower  
289 mutation rates. These results broadly agree with the conclusions of Roze and Rousset (2009)  
290 who, by using a genetically explicit, infinite site model of genetic load, showed that heterosis can  
291 have a substantial role in dispersal evolution, in contrast with what shown by previous models  
292 (Guillaume and Perrin 2006; Ravigné et al. 2006). Importantly, the results also show that the  
293 qualitative predictions made by (Roze and Rousset 2009) hold when assuming a realistic  
294 distribution of mutational effects in terms of selection and dominance coefficients; despite the  
295 accumulation of many mutations with very low (almost neutral) selection coefficient, substantial  
296 heterosis is maintained as it is its substantial role (relative to kin competition) in driving dispersal  
297 evolution.

298         The level of evolved ID depended on the level of evolved dispersal, and hence on dispersal  
299 cost (Fig. 1C-E; Table S2). Higher dispersal cost led to lower  $d$  and consequent higher inbreeding  
300 within local populations, reflected by higher neutral homozygosity (Fig. 1C). In turn, more  
301 inbreeding facilitated purging of deleterious recessive mutations thus reducing ID. This was true  
302 for both components of ID. Both lethal mutations (strongly recessive mutations causing ID in early  
303 life – offspring survival, Fig. 1E) and mildly deleterious mutations (causing ID in later life – adult  
304 reproduction probability, Fig. 1C) experienced greater purging at lower dispersal, where both the  
305 mutation load (i.e., the decrease in fitness for outbred individuals) and ID were lower compared

306 to scenarios with much higher dispersal evolving, albeit greater differences were observed for ID  
307 rather than for mutation load (Table S2). This pattern was conserved at lower mutation rates  
308 although much less genetic load accumulated, leading to higher individual fitness and lower  
309 mutation and inbreeding load (Fig. S1C-E; S2C-E). There is therefore a positive feedback  
310 between evolution of dispersal and inbreeding depression, whereby high dispersal maintains high  
311 levels of inbreeding depression, which in turn maintains positive selection for dispersal.

312 ***Evolution of polyandry and inbreeding depression given low dispersal.*** Like dispersal,  
313 polyandry (expected female number of matings,  $P = 1 + 1/a$ ) evolved in response to ID when  
314 dispersal was low and not evolving, to a level that depended on the fitness cost of female multiple  
315 mating (Fig. 1B; Fig. S4). Given no cost of polyandry, females evolved to mate with all the males  
316 present in the population. However, even a very small cost reduced substantially  $\bar{P}$  (where  $\bar{P}$   
317 represents the mean phenotypic value for one replicate metapopulation); yet moderate polyandry  
318 evolved. For example, strength of direct selection on re-mating  $\omega_m^2 = 1000$  led to evolution of  
319 median  $\bar{P} = 4.13$  (95%CI 3.51-5.26) (median and CI are taken across 20 replicates),  
320 corresponding to an average realized survival cost of 0.005 for females. On the contrary, in the  
321 absence of ID, polyandry did not evolve even when free of cost (Fig. 1B and S4, dashed lines).  
322 Lower rates of mildly deleterious and lethal mutations substantially reduced selection for  
323 polyandry such that hardly any polyandry evolved, or evolution took considerably longer time (Fig.  
324 S1B; S2B).

325

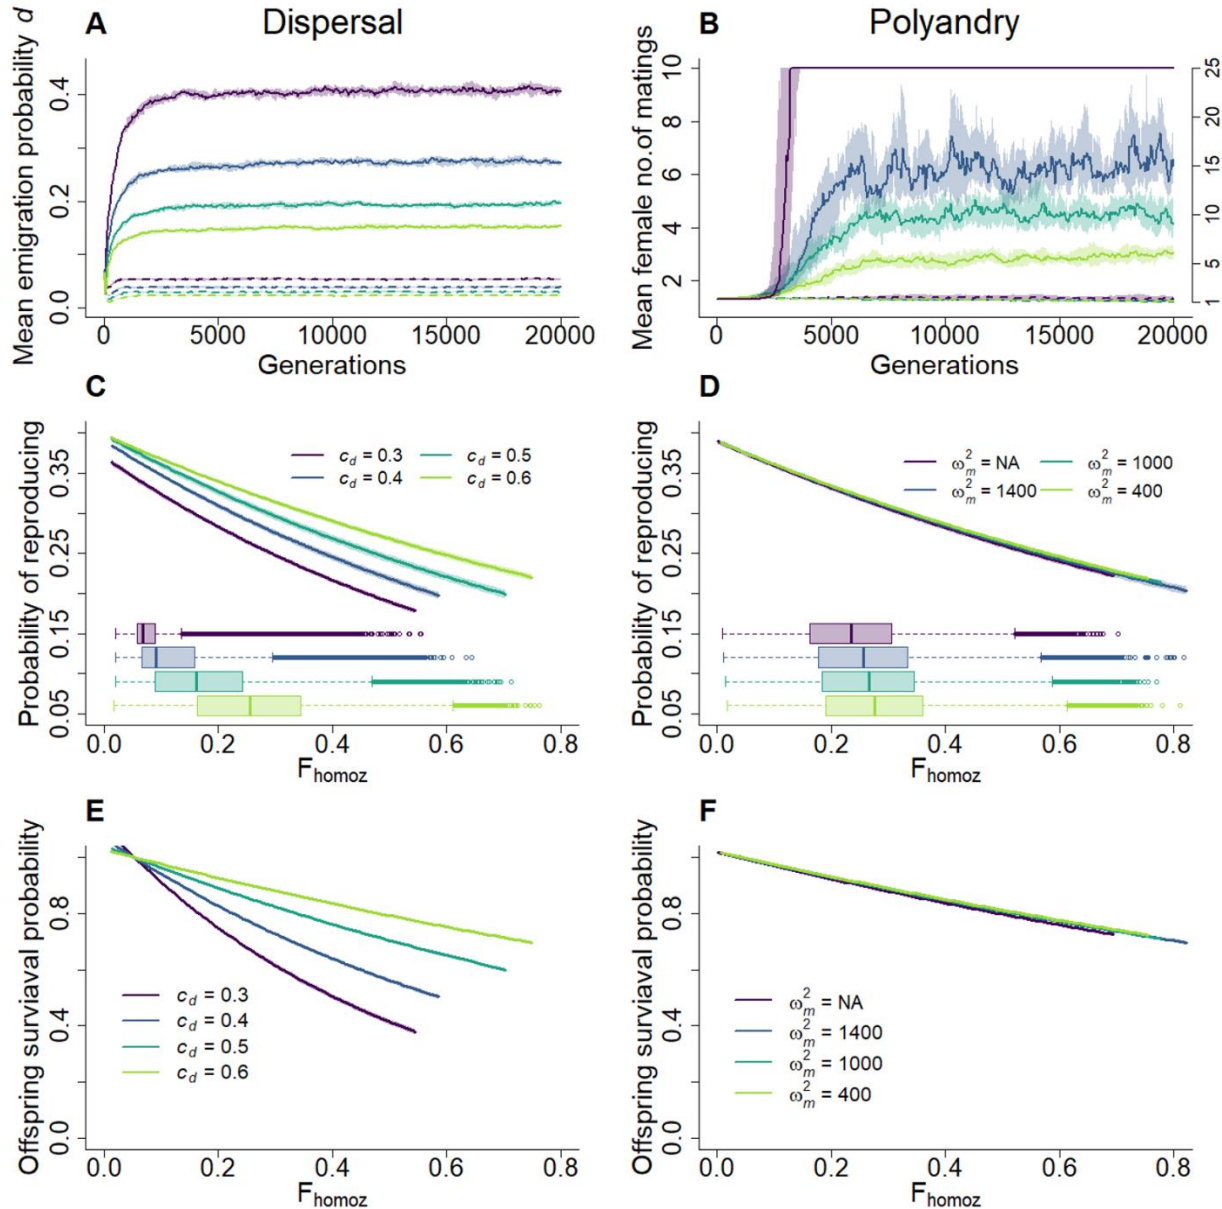

326

327 **Figure 1. Inbreeding depression promotes evolution of dispersal and polyandry when**  
 328 **either one trait or the other evolves. A)** Evolution of mean dispersal probability phenotypes  $d$   
 329 in the absence of polyandry ( $a = 3.0$ ), under different costs of dispersal ( $c_d = 0.3, 0.4, 0.5, 0.6$ ),  
 330 in the absence (dashed lines) or presence (solid lines) of deleterious mutations. **B)** Evolution of  
 331 mean polyandry phenotypes (expected female number of matings  $P = 1 + 1/a$ ) under fix dispersal  
 332 probability ( $d = 0.05$ ), as a function of different strengths of direct selection against female  
 333 remating (no cost;  $\omega_m^2 = 1400, 1000, 400$ ) in the absence (dashed lines) or presence (solid lines)  
 334 of deleterious mutations. In the presence of deleterious mutations and no direct selection against

335 polyandry ( $\omega_m^2 = NA$ ), females evolve to mate with all the males in the population; the y-axis on  
336 the right hand-side refers to this single line (purple). Lines represent the median of mean  
337 phenotypes across 20 replicated simulations; colored shades depict the first and third quartile. **C-**  
338 **D)** Relationship between individual probability of reproducing and inbreeding coefficient  $F_{homoz}$   
339 (i.e., ID in reproduction probability) when C) dispersal evolves under different costs, in the  
340 absence of polyandry and, D) polyandry evolves under different strengths of direct selection, with  
341 fix dispersal probability. Lines show the fitted models and colored shades the 95% CI. Models are  
342 fitted at generation 20,000 to a subsample of 140 populations, across 10 replicates. Boxplots  
343 represents the distribution of the individual  $F_{homoz}$ . **E-F)** Relationship between offspring survival  
344 probability and  $F_{homoz}$  (i.e., ID in offspring survival probability). In E) simulation scenarios and  
345 parameters as in C); in F) as in D). The coefficients (i.e., mutation load and inbreeding load) and  
346 standard errors of all the fitted models are presented in Table S2.

347

348         These results provide a positive answer to the still standing question of whether costly  
349 polyandry can evolve, at least in theory, as a mechanism of indirect inbreeding avoidance in  
350 spatially structured populations (Germain et al. 2018). Specifically, they show that costly  
351 polyandry, although the cost needs to be quite low, as predicted by (Cornell and Tregenza 2007),  
352 can indeed evolve in response to inbreeding depression given: i) inbreeding depression caused  
353 exclusively by deleterious recessive mutations, and without the need for overdominant mutations  
354 (Cornell and Tregenza 2007); ii) realistic deleterious mutation rates and distribution of fitness  
355 effects (Caballero and Keightley 1994; Schultz and Lynch 1997; Haag-Liautard et al. 2007); iii)  
356 and complex sibship structure emerging in spatially structured populations (Germain et al. 2018).  
357 Thus, polyandry evolution as a means of indirect inbreeding avoidance might be more widely  
358 spread than previously thought (Cornell and Tregenza 2007; Germain et al. 2018), and therefore  
359 a potentially important mechanism to explain the existence of even low levels of polyandry across  
360 multiple systems, especially when dispersal is low.

361         Although polyandry evolved in response to the presence of genetic load, the level of  
362 evolved polyandry under different costs did not substantially change the level of inbreeding  
363 (measured as neutral homozygosity) and ID at equilibrium (Fig. 1D-F; Table S2; Fig. S1D-F; S2D-



364 F). In fact, both the mutation load and ID were the same across levels of evolved polyandry and  
365 polyandry's costs. The level of mutation and inbreeding load was mainly determined by dispersal,  
366 which was fixed to  $d = 0.05$ , and similar to what evolved under high cost of dispersal and no  
367 polyandry (Fig. 1C-E). This was true also for heterosis (Fig. S4). Thus, under low fixed dispersal  
368 probability, polyandry seems to have a minimal effect, if any, on the purging or accumulation of  
369 genetic load, ID and, not surprisingly, heterosis. Unlike with dispersal therefore, with polyandry  
370 there seems not to be scope for a positive feedback with inbreeding depression, but just for one-  
371 direction effect of inbreeding depression on polyandry evolution.

372 **Joint evolution of dispersal, polyandry, and inbreeding depression.** When dispersal and  
373 polyandry could evolve jointly, results clearly confirmed the hypothesis of a negative feedback  
374 between two competing mechanisms of inbreeding avoidance (Fig. 2; S5). This feedback was  
375 modulated by the relative costs of the two evolving behaviors. For a given cost of dispersal ( $c_d$ ),  
376 higher dispersal evolved under monandry; *vice versa*, the higher the evolved level of polyandry  
377 (hence for lower costs of female re-mating) the lower the evolved emigration probability. For  
378 example,  $c_d = 0.3$  led to evolution of median  $\bar{d} = 0.39$  (95%CI 0.375-0.396) and median  $\bar{P} = 1.97$   
379 (95%CI 1.763-2.173) for high cost of female re-mating ( $\omega_m^2 = 400$ ), while it led to median  $\bar{d} = 0.31$   
380 (95%CI 0.312-0.322) and to females mating with all the males in the population ( $P = 25$ ) when  
381 female re-mating did not carry costs. On the other hand, for a given cost of female re-mating,  
382 higher polyandry evolved given lower evolved dispersal (hence for higher  $c_d$ ). For example,  $\omega_m^2 =$   
383 1000 led to evolution of median  $\bar{d} = 0.13$  (95%CI 0.126-0.131) and median  $\bar{P} = 4.49$  (95%CI  
384 3.842-5.317) for high cost of dispersal ( $c_d = 0.6$ ), while it led to median  $\bar{d} = 0.38$  (95%CI 0.36-  
385 0.383) and median  $\bar{P} = 2.58$  (95%CI 2.467-2.814) for  $c_d = 0.3$ . This joint evolution and negative  
386 feedback did not emerge when the two traits evolved in the absence of genetic load and hence  
387 ID (Fig. S6), where dispersal evolved to very low levels while polyandry did not evolve.

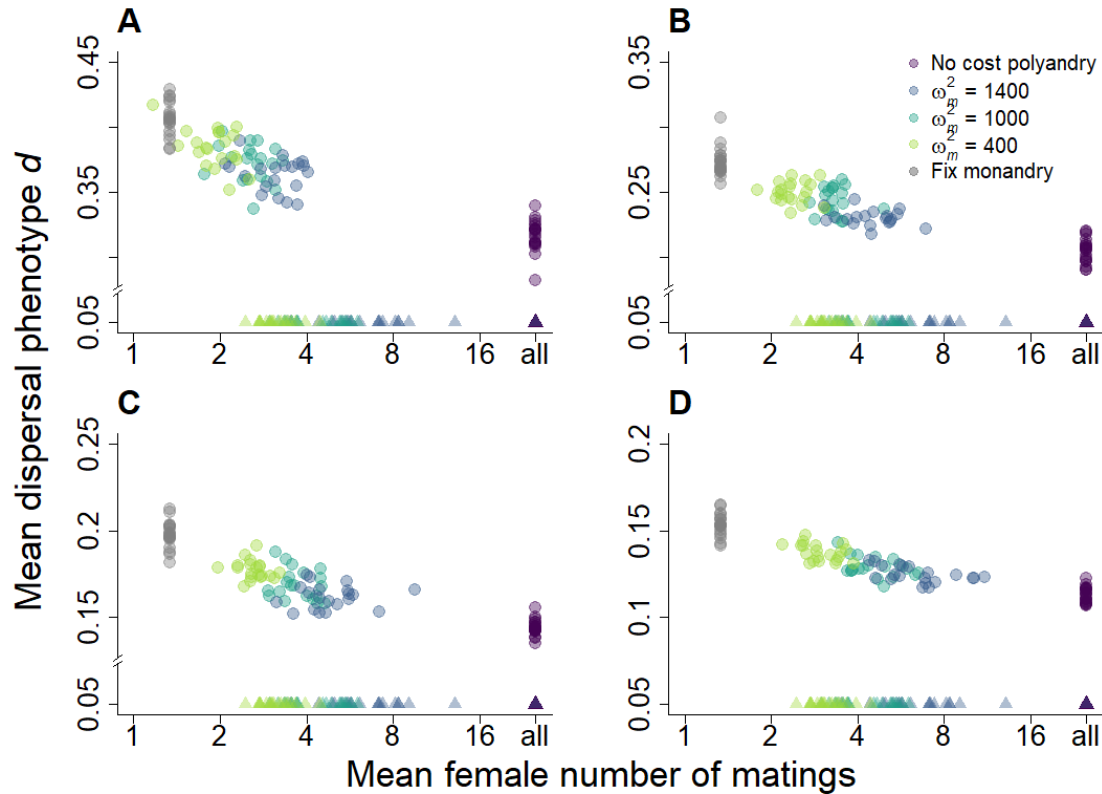

388

389 **Figure 2. Dispersal and polyandry negatively feedback to each other evolution under**  
 390 **inbreeding depression.** Joint evolution of mean dispersal probability phenotypes  $d$  and mean  
 391 polyandry phenotypes (mean female number of matings:  $P = 1 + 1/a$ ) in the presence of  
 392 inbreeding depression, given different costs of dispersal  $c_d$  (**A**: 0.3; **B**: 0.4; **C**: 0.5; **D**: 0.6) and  
 393 different strengths of direct selection against female re-mating (no cost;  $\omega_m^2 = 1400, 1000, 400$ ).  
 394 Each data point represents the mean phenotypic values for one out of 20 replicate simulations at  
 395 generation 20,000. Colored dots indicate simulations where dispersal and polyandry jointly  
 396 evolved; triangles, simulations where polyandry evolved given fix dispersal probability ( $d = 0.05$ );  
 397 grey dots, simulations where dispersal evolved given fix monandry ( $a = 3.0$ ). The x-axis is on the  
 398 logarithmic scale to aid visualization. Note the different y-axis scales for the four panels. Other  
 399 parameters:  $U_d = 1.0$ ,  $U_l = 0.2$ .

400

401 The negative correlation between evolved emigration probability ( $d$ ) and polyandry ( $P$ )  
 402 was present at the metapopulation level (i.e., simulation replicate level), whereby for a given cost  
 403 of dispersal and strength of direct selection on female re-mating, systems that evolved higher

404 emigration probability phenotypes, also evolved lower polyandry, and *vice versa* (Fig. S7). This  
405 correlation was present when female re-mating was costly; in the absence of re-mating costs the  
406 correlation disappeared as females consistently evolved to mate with all the males in the  
407 population. Within a metapopulation, there was no evidence of a negative correlation between  $d$   
408 and  $P$ , whereby subpopulations with higher dispersal might have had lower polyandry (Fig. S8).  
409 Further, there was no evidence of any genetic correlation between  $g_d$  and  $g_a$ , nor between  $d$  and  
410  $P$  (Fig. S9).

411 Lower rates of mildly deleterious and lethal mutations led to evolution of lower dispersal  
412 and polyandry (Fig. S10), similarly to when the two traits evolved independently (Fig. S1-S2).  
413 Polyandry hardly evolved, apart from a few exception simulations under no or weak direct  
414 selection against female re-mating, where it reached high levels. A strong negative correlation  
415 between dispersal and polyandry phenotypes was present at the metapopulation level when some  
416 polyandry evolved, while it disappeared for very low mutation rates combined with costly  
417 polyandry (Fig. S11). As for higher rates of deleterious mutations, at lower mutation rates there  
418 was no evidence of a negative correlation between dispersal and polyandry at the subpopulation  
419 level, nor of any genetic correlation (Fig. S12-S13).

420 The evolved level of ID depended mainly on the cost of dispersal, and hence on the level  
421 of evolved dispersal (Fig. 3-4; Table S3). As for the scenario where dispersal evolved under fixed  
422 monandry (Fig. 1C-E), higher cost and consequent lower evolved dispersal led to lower  
423 inbreeding depression to both probability of reproducing (Fig. 3A, Fig. 4 diamonds) and offspring  
424 survival (Fig. 3B, Fig. 4 dots). Interestingly, under the joint evolution of dispersal and polyandry,  
425 polyandry had a slight but detectable effect on the level of evolved ID, compared to when evolving  
426 under fixed low dispersal (Fig. 1D-F). Specifically, for a given dispersal cost, higher polyandry  
427 (lower strength of direct selection on female re-mating) led to the accumulation of lower inbreeding

428 load in offspring survival, especially for lower costs of dispersal (Fig. 4 dots; Table S3). The  
429 difference was especially evident when comparing no cost vs costly polyandry. For the inbreeding  
430 load in adult reproduction, this effect was present but only very slight and with overlapping  
431 confidence intervals between different costs of polyandry (Fig. 4 diamonds; Table S3). This result  
432 is perhaps surprising and counterintuitive as the expectation would be for more polyandry to lead  
433 to accumulation of higher load, due to reduced inbreeding and purging, and not the opposite as  
434 observed here. However, this effect might be due to high polyandry reducing evolved dispersal  
435 thus, in fact, facilitating slightly greater purging through its effect on dispersal.

436 Finally, the emerging heterosis in the system was exclusively driven by the level of evolved  
437 dispersal, and hence by dispersal cost. Higher heterosis was present under high costs of  
438 dispersal, thus generating strong positive selection for dispersal, counteracting the high cost (Fig.  
439 4B).

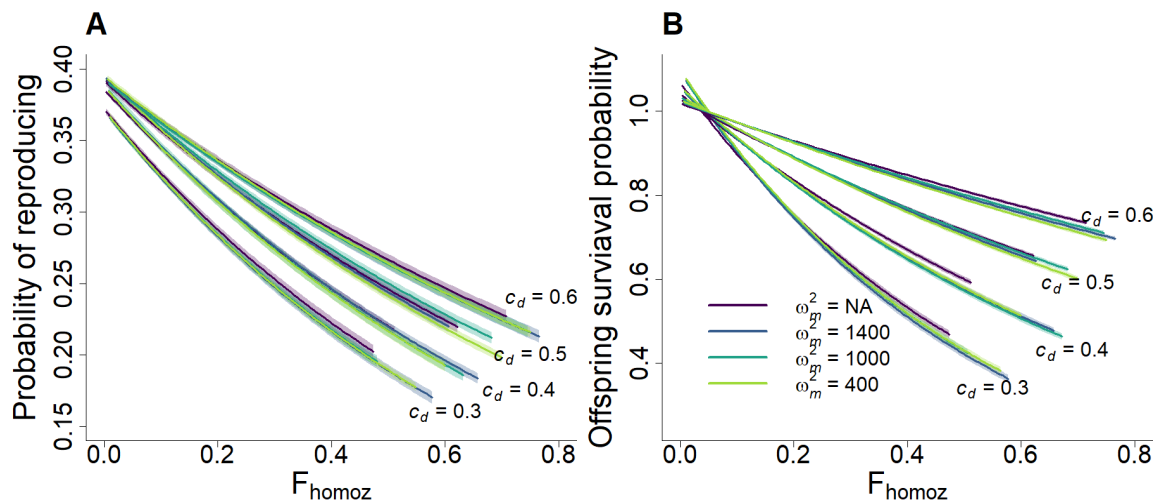

440

441

442 **Figure 3. Jointly evolving dispersal and polyandry affect evolution of inbreeding**  
443 **depression in reproduction and survival.** Relationship between **A)** individual probability of  
444 reproducing and neutral homozygosity  $F_{\text{homoz}}$  (i.e., inbreeding depression in reproduction  
445 probability), and **B)** between offspring survival probability and neutral homozygosity (i.e.,

446 inbreeding depression in offspring survival probability). Results are presented for varying costs of  
447 dispersal ( $c_d$ ) and strengths of direct selection against female multiple mating ( $\omega_m^2$ ; colors). Lines  
448 show the fitted models and colored shades the 95% CI. The coefficients (i.e., mutation load and  
449 inbreeding load) and standard errors of all the fitted models are presented in Table S3. Models  
450 are fitted at generation 20,000 to a subsample of 140 populations, across 10 replicates.

451

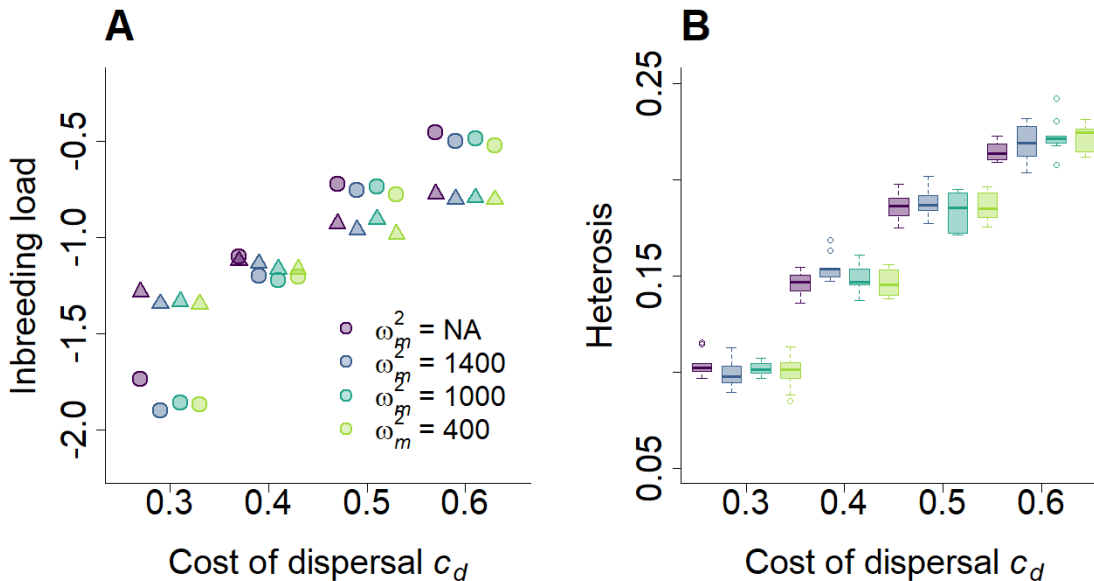

452

453 **Figure 4. Inbreeding load and heterosis emerging under the joint evolution of dispersal**  
454 **and polyandry. A)** Estimated slopes of probability of offspring survival (dots) and probability of  
455 reproduction (triangles) on individual neutral homozygosity  $F_{\text{homozygosity}}$  (i.e., inbreeding load), for  
456 different cost of dispersal ( $c_d$ ) and strengths of direct selection on female multiple mating ( $\omega_m^2$ ;  
457 colors). Results are presented on the log scale. Standard errors are not shown because smaller  
458 than the dots size. Models are fitted at generation 20,000 to a subsample of 140 populations,  
459 across 10 replicates. **B)** Heterosis as a function of  $c_d$  and  $\omega_m^2$  (the color legend is the same as in  
460 A). Heterosis is shown as median (solid bands), first and third quartiles (box limits), and  
461 approximately twice the standard deviation (whiskers) over 20 replicate simulations at generation  
462 20,000.

463

464

465 **General discussion.** These results shed light on the previously unconsidered intimate  
466 connection existing between dispersal and polyandry evolution through their shared driver of  
467 inbreeding depression, and on their effect on evolution of inbreeding depression itself. They  
468 highlight important interactions between the evolution of two fundamental life-histories which  
469 shape gene flow in space and time, and thereby affect species' eco-evolutionary dynamics. More  
470 broadly, these results demonstrate the need to consider life-history evolution as happening within  
471 a complex and integrated system, where multiple competing and degenerate routes to reduce  
472 fitness costs can arise and affect each other's evolutionary dynamics (Edelman and Gally 2001;  
473 Mason 2015). This becoming strongly apparent in different complex biological systems, such as  
474 genetic codes and networks, neural networks, organismal development, population and  
475 community dynamics (see examples within Edelman and Gally 2001; Mason 2015)), but perhaps  
476 it has not been into the investigation of life-history evolution. For example, within the context of  
477 evolution of polyandry as inbreeding avoidance strategy, Duthie et al. (2018) showed that  
478 evolution of pre-copulatory and post-copulatory mechanisms of inbreeding avoidance and  
479 associated polyandry is affected by evolutionary feedbacks and degeneracy. Thus, understanding  
480 when and how we can expect to observe different patterns of life-history traits co-occurrence  
481 requires explicitly modelling feedbacks between competing and / or complementary evolutionary  
482 routes.

483 Here, I show that through their effect on the population relatedness structure, and hence  
484 on inbreeding levels, dispersal and polyandry can negatively feedback to each other evolution,  
485 thereby providing two competing mechanisms for compensating the negative fitness effects of  
486 genetic load. The engine of this feedback is inbreeding depression. Without genetic load giving  
487 rise to inbreeding depression and heterosis, kin competition alone is not sufficient for a negative  
488 relationship between dispersal and polyandry to emerge, nor for polyandry to evolve. Despite the

489 recognition that dispersal and mating system evolution may be profoundly interconnected, leading  
490 to observable dispersal-mating system syndromes (Ronce and Clobert 2012; Auld and Rubio de  
491 Casas 2013; Hargreaves and Eckert 2014), previous theory has rarely focused on their joint  
492 evolution, with the notable exception of joint evolution of dispersal and self-fertilization (Massol  
493 and Cheptou 2011; Sun and Cheptou 2012; Iritani and Cheptou 2017). Further, the relatively  
494 recent recognition of the widespread occurrence and importance of female multiple mating meant  
495 that the relationship of this key component of many mating systems with dispersal has been  
496 understudied compared to monogamy and polygyny. Probably the paucity of theory and clear  
497 testable predictions, and the inherent difficulties in studying these two complex suits of behaviors  
498 empirically (Rhainds 2017), underlie the scarcity of empirical evidence on patterns of dispersal-  
499 polyandry co-occurrence and joint evolution, especially, but not exclusively, at the individual level  
500 (Laloi et al. 2009; Reid and Arcese 2020).

501         This model provides the clear prediction of a negative correlation between dispersal and  
502 female multiple mating at the species or metapopulation level, provided the presence of  
503 inbreeding depression. This means that we might expect to find that females of highly dispersive  
504 species (or metapopulations) engage less in multiple mating, while expecting to observe high  
505 frequency of female multiple mating in highly philopatric species (or metapopulations) for which,  
506 for example, dispersal is very costly. A recent analysis of song sparrow's (*Melospiza melodia*)  
507 long term pedigree data from the population occupying the small island of Mandarte (British  
508 Columbia, Canada) showed that recent immigrants to the population had lower breeding values  
509 for female extra-pair reproduction (which results from underlying polyandry) than the local  
510 population (Reid and Arcese 2020). This rare empirical evidence points towards a negative  
511 correlation between dispersal and female multiple mating, in this case present between the island

512 and the mainland (much larger) population, although the causes of such relationship are currently  
513 unknown.

514 Results from my current model did not show any covariance between polyandry and  
515 dispersal at finer spatial scale (e.g., within a metapopulation), or at the individual level. Likewise,  
516 very few empirical studies have explicitly tested for the presence of such covariance, and not  
517 always found evidence of it (Rhainds 2017; Rafter et al. 2018; Reid and Arcese 2020). However,  
518 there are assumptions embedded within the model structure that could affect these predictions,  
519 pointing towards the need for further theoretical work needed to resolve whether we should expect  
520 any covariance between these two traits at the population or individual level. The model is  
521 ecologically quite simple; the environment is spatially homogeneous as are the costs of dispersal  
522 and polyandry. Similarly, the relatively high levels of dispersal evolving, combined with the long-  
523 distance dispersal allowed by the negative exponential dispersal kernel and the homogeneous  
524 environment (and consequently homogeneous risk of inbreeding), impede populations to diverge  
525 in their evolutionary trajectories for dispersal and polyandry, such that populations evolve as a  
526 single system despite the emerging internal relatedness structure. A spatially heterogeneous  
527 environment where, for example, some populations are more isolated than others, or where  
528 populations experience different costs of dispersal and/or polyandry, may promote a negative  
529 relationship between dispersal and polyandry at the population level whereby frequency of female  
530 multiple mating may be expected to be higher in more isolated populations.

531 The model does not allow for evolution of sex-biased dispersal (Li and Kokko 2019).  
532 Although evolution of sex-biased dispersal is not a necessary condition for inbreeding avoidance  
533 through dispersal (Guillaume and Perrin 2009; Roze and Rousset 2009; Li and Kokko 2019)and,  
534 on the other hand, it is itself affected by multiple ecological and evolutionary drivers other than  
535 inbreeding depression (Henry et al. 2016; Li and Kokko 2019), evolution of sex-biased dispersal



536 could change the dynamics of joint evolution of dispersal and polyandry in ways that are difficult  
537 to predict without explicit investigation. Evolution of sex-biased dispersal and the direction of the  
538 bias depend on sex differences in fitness variance between patches, where, generally, the sex  
539 with the larger between-patch variance in fitness evolves to disperse more (Li and Kokko 2019).  
540 As the effect of polyandry on sex-specific variance in fitness is hard to predict (Lotterhos 2011;  
541 Bocedi and Reid 2017), this cascades in the challenge to predict its effect on sex-biased dispersal.  
542 Interestingly, although previous models considered the effect of different mating systems on the  
543 evolution of sex-biased dispersal given inbreeding depression (Hirota 2005; Guillaume and Perrin  
544 2009; Henry et al. 2016), no model to my knowledge has considered the opposite, that is the  
545 effect of sex-biased dispersal on mating system evolution, nor the potential feedbacks between  
546 the two, revealing yet another knowledge gap in our understanding of life-history evolution in  
547 spatially structured systems.

548         The life cycle represented in this model is also relatively simplified with mating occurring  
549 after dispersal and non-overlapping generations. The timing of mating relative to dispersal can  
550 affect gene flow and the genetic structure of the population thereby affecting evolution of both  
551 dispersal and mating system (Hirota 2004; Shaw and Kokko 2015; Lakovic et al. 2017). In species  
552 with post-mating dispersal, as many invertebrate species where females disperse after mating  
553 and before oviposition, polyandry has been hypothesized to be particularly beneficial for  
554 dispersing females colonizing new habitat patches as their offspring would benefit from half-sib  
555 rather than full-sib matings, thus reducing the level of inbreeding in the females' grand-offspring  
556 (Cornell and Tregenza 2007). Moreover, post-mating dispersal is much less effective, if at all, in  
557 avoiding inbreeding as mating takes place within the natal population (Li and Kokko 2019). In this  
558 case, a positive covariance between dispersal and polyandry would be expected. Although high  
559 levels of polyandry have been demonstrated in the field for two stored grain pest beetles with

560 post-mating dispersal, a positive covariance between dispersal and female multiple mating has  
561 not been found (Rafter et al. 2018). This positive association between polyandry and dispersal in  
562 species with post-mating dispersal could be particularly beneficial during colonization of empty  
563 patches thus, for example during range expansion or shifting, relative to within an established  
564 spatially structured population (Rafajlović et al. 2013; Ding et al. 2017). Indeed, experimental  
565 studies with seed and flour beetles have shown that multiple mated females establish fitter  
566 populations both in benign and thermally challenging environments (Power and Holman 2014;  
567 Lewis et al. 2020). These results, together with the ones presented here, point to the possibility  
568 that the relationship between dispersal and polyandry will be dependent on the ecological and  
569 demographic context, and on other species' life-histories. However, we lack theoretical  
570 predictions on how dispersal and polyandry may covary under range expansion conditions, under  
571 different timing of dispersal relative to mating, as well as we lack empirical estimates of such  
572 covariance under both static and dynamic spatial structure. There is therefore large and  
573 interesting potential to step-up and expand our knowledge on the evolution of dispersal and  
574 mating systems by embracing their joint evolution and feedbacks, theoretically as well as  
575 empirically.

## 576 **Acknowledgments**

577 I am grateful to J. M. Reid and J. M. J. Travis as this work would not have been possible without  
578 their mentorship. I thank A. B. Duthie, M. Tschol, A. Charmouh and L. Dunan for helpful  
579 discussions. This work was supported by a Royal Society University Research Fellowship to GB  
580 (UF160614), and initially by the European Research Council through funding to J.M. Reid. All  
581 simulations were performed on the University of Aberdeen HPC, Maxwell.

582

583

584 **References**

- 585 Agrawal, A. F., and M. C. Whitlock. 2011. Inferences about the distribution of dominance drawn  
586 from yeast gene knockout data. *Genetics* 187:553–566.
- 587 Arnqvist, G., and T. Nilsson. 2000. The evolution of polyandry: multiple mating and female  
588 fitness in insects. *Anim Behav* 60:145–164.
- 589 Auld, J. R., and R. Rubio de Casas. 2013. The Correlated Evolution of Dispersal and Mating-  
590 System Traits. *Evol Biol* 40:185–193.
- 591 Bocedi, G., and J. M. Reid. 2017. Feed-backs among inbreeding, inbreeding depression in  
592 sperm traits, and sperm competition can drive evolution of costly polyandry. *Evolution*  
593 71:2786–2802.
- 594 Caballero, A., and P. D. Keightley. 1994. A pleiotropic nonadditive model of variation in  
595 quantitative traits. *Genetics* 138:883–900.
- 596 Charlesworth, D., and B. Charlesworth. 1987. Inbreeding depression and its evolutionary  
597 consequences. *Annu Rev Ecol Syst* 18:237–268.
- 598 Charlesworth, D., and J. H. Willis. 2009. The genetics of inbreeding depression. *Nat Rev Genet*  
599 10:783–96.
- 600 Cheptou, P., A. Hargreaves, D. Bonte, and H. Jacquemyn. 2017. Adaptation to fragmentation:  
601 Evolutionary dynamics driven by human influences. *Philosophical Transactions of the*  
602 *Royal Society B* 372:20160037.
- 603 Clobert, J., M. Baguette, T. G. Benton, and J. M. Bullock. 2012. *Dispersal Ecology and*  
604 *Evolution*. Oxford University Press.
- 605 Cornell, S. J., and T. Tregenza. 2007. A new theory for the evolution of polyandry as a means of  
606 inbreeding avoidance. *Proceedings of the Royal Society B* 274:2873–9.
- 607 Ding, G., H. Xu, B. P. Oldroyd, and R. S. Gloag. 2017. Extreme polyandry aids the  
608 establishment of invasive populations of a social insect. *Heredity* 119:381–387.
- 609 Duthie, A. B., G. Bocedi, R. R. Germain, and J. M. Reid. 2018. Evolution of precopulatory and  
610 post-copulatory strategies of inbreeding avoidance and associated polyandry. *J Evol Biol*  
611 31:31–45.
- 612 Duthie, A. B., G. Bocedi, and J. M. Reid. 2016. When does female multiple mating evolve to  
613 adjust inbreeding? Effects of inbreeding depression, direct costs, mating constraints, and  
614 polyandry as a threshold trait. *Evolution* 70:1927–1943.
- 615 Edelman, G. M., and J. A. Gally. 2001. Degeneracy and complexity in biological systems.  
616 *Proceedings of the National Academy of Sciences* 98:13763–13768.
- 617 Eyre-Walker, A., and P. D. Keightley. 2007. The distribution of fitness effects of new mutations.  
618 *Nat Rev Genet* 8:610–8.
- 619 Fromhage, L., H. Kokko, and J. M. Reid. 2009. Evolution of mate choice for genome-wide  
620 heterozygosity. *Evolution* 63:684–94.

- 621 Gandon, S. 1999. Kin competition, the cost of inbreeding and the evolution of dispersal. *J Theor*  
622 *Biol* 200:345–364.
- 623 Germain, R. R., P. Arcese, and J. M. Reid. 2018. The Consequences of Polyandry for Sibship  
624 Structures, Distributions of Relationships and Relatedness, and Potential for Inbreeding in  
625 a Wild Population. *Am Nat* 191:638–657.
- 626 Gilbert, K. J., N. P. Sharp, A. L. Angert, G. L. Conte, J. A. Draghi, F. Guillaume, A. L.  
627 Hargreaves, R. Matthey-Doret, and M. C. Whitlock. 2017. Local Adaptation Interacts with  
628 Expansion Load during Range Expansion: Maladaptation Reduces Expansion Load. *Am*  
629 *Nat* 189:368–380.
- 630 Guillaume, F., and N. Perrin. 2009. Inbreeding load, bet hedging, and the evolution of sex-  
631 biased dispersal. *Am Nat* 173:536–41.
- 632 Guillaume, F., and N. Perrin. 2006. Joint evolution of dispersal and inbreeding load. *Genetics*  
633 173:497–509.
- 634 Haag-Liautard, C., M. Dorris, X. Maside, S. Macaskill, D. L. Halligan, D. Houle, B. Charlesworth,  
635 and P. D. Keightley. 2007. Direct estimation of per nucleotide and genomic deleterious  
636 mutation rates in *Drosophila*. *Nature* 445:82–85.
- 637 Hanski, I. 2011. Eco-evolutionary spatial dynamics in the Glanville fritillary butterfly. *Proc Natl*  
638 *Acad Sci USA* 108:14397–14404.
- 639 Hargreaves, A. L., and C. G. Eckert. 2014. Evolution of dispersal and mating systems along  
640 geographic gradients: Implications for shifting ranges. *Funct Ecol* 28:5–21.
- 641 Hedrick, P. W., and A. Garcia-Dorado. 2016. Understanding Inbreeding Depression, Purging,  
642 and Genetic Rescue. *Trends Ecol Evol* 31:940–952. Elsevier Ltd.
- 643 Henry, R. C., A. Coulon, and J. M. J. Travis. 2016. The evolution of male-biased dispersal under  
644 the joint selective forces of inbreeding load and demographic and environmental  
645 stochasticity. *Am Nat* 188:423–433.
- 646 Hirota, T. 2005. The effect of female polyandry and sperm precedence on the evolution of  
647 sexual difference in dispersal timing. *J Evol Biol* 1395–402.
- 648 Hirota, T. 2004. The evolution of sex-biased dispersal by pre-dispersal copulation and  
649 fluctuating environment. *J Anim Ecol* 73:1115–1120.
- 650 Holman, L., and H. Kokko. 2013. The consequences of polyandry for population viability,  
651 extinction risk and conservation. *Philosophical Transactions of the Royal Society B*  
652 368:20120053.
- 653 Huber, C. D., A. Durvasula, A. M. Hancock, and K. E. Lohmueller. 2018. Gene expression  
654 drives the evolution of dominance. *Nat Commun* 9.
- 655 Iritani, R., and P. O. Cheptou. 2017. Joint evolution of differential seed dispersal and self-  
656 fertilization. *J Evol Biol* 30:1526–1543.

- 657 Jennions, M. D., and M. Petrie. 2000. Why do females mate multiply? A review of the genetic  
658 benefits. *Biological Reviews* 75:21–64.
- 659 Keller, L., and D. Waller. 2002. Inbreeding effects in wild populations. *Trends Ecol Evol* 17:19–  
660 23.
- 661 Kimura, M. 1965. A stochastic model concerning the maintenance of genetic variability in  
662 quantitative characters. *Proc Natl Acad Sci USA* 54:731–736.
- 663 Kvarnemo, C., and L. Simmons. 2013. Polyandry as a mediator of sexual selection before and  
664 after mating. *Philosophical Transactions of the Royal Society B* 368:20120042.
- 665 Lakovic, M., O. Mitesser, and T. Hovestadt. 2017. Mating timing, dispersal and local adaptation  
666 in patchy environments. *Oikos* 126:1804–1814.
- 667 Laloi, D., M. Richard, P. Fédérici, J. Clobert, P. Teillac-Deschamps, and M. Massot. 2009.  
668 Relationship between female mating strategy, litter success and offspring dispersal. *Ecol*  
669 *Lett* 12:823–9.
- 670 Lande, R., and D. Schemske. 1985. The evolution of self-fertilization and inbreeding depression  
671 in plants. I. Genetic models. *Evolution* 39:24–40.
- 672 Lande, R., D. W. Schemske, and S. T. Schultz. 1994. High inbreeding depression, selective  
673 interference among loci, and the threshold selfing rate for purging recessive lethal  
674 mutations. *Evolution* 48:965–978.
- 675 Legrand, D., J. Cote, E. A. Fronhofer, R. D. Holt, O. Ronce, N. Schtickzelle, J. M. J. Travis, and  
676 J. Clobert. 2017. Eco-evolutionary dynamics in fragmented landscapes. *Ecography* 40:9–  
677 25.
- 678 Lewis, R. C., M. D. Pointer, L. A. Friend, R. Vasudeva, J. Bemrose, A. Sutter, M. J. G. Gage,  
679 and L. G. Spurgin. 2020. Polyandry provides reproductive and genetic benefits in  
680 colonising populations. *Ecol Evol* 10:10851–10857.
- 681 Li, X. Y., and H. Kokko. 2019. Sex-biased dispersal: a review of the theory. *Biological Reviews*  
682 94:721–736.
- 683 Lotterhos, K. E. 2011. The context-dependent effect of multiple paternity on effective population  
684 size. *Evolution* 65:1693–1706.
- 685 Markert, J. A., P. R. Grant, B. R. Grant, L. F. Keller, J. L. Coombs, and K. Petren. 2004. Neutral  
686 locus heterozygosity, inbreeding, and survival in Darwin's ground finches (*Geospiza fortis*  
687 and *G. scandens*). *Heredity* 92:306–315.
- 688 Mason, P. H. 2015. Degeneracy: Demystifying and destigmatizing a core concept in systems  
689 biology. *Complexity* 20:12–21.
- 690 Massol, F., and P. O. Cheptou. 2011. When should we expect the evolutionary association of  
691 self-fertilization and dispersal? *Evolution* 65:1217–1220.
- 692 Morton, N. E., J. F. Crow, and H. J. Muller. 1956. An estimate of the mutational damage in man  
693 from data on consanguineous marriages. *Proc Natl Acad Sci U S A* 42:855–863.

- 694 Neff, B. D., and T. E. Pitcher. 2008. Mate choice for non-additive genetic benefits: a resolution  
695 to the lek paradox. *J Theor Biol* 254:147–55.
- 696 Nietlisbach, P., S. Muff, J. M. Reid, M. C. Whitlock, and L. F. Keller. 2019. Nonequivalent lethal  
697 equivalents: Models and inbreeding metrics for unbiased estimation of inbreeding load.  
698 *Evol Appl* 12:266–279.
- 699 Parker, G., and T. Birkhead. 2013. Polyandry: the history of a revolution. *Philosophical*  
700 *Transactions of the Royal Society B* 368:20120335.
- 701 Peischl, S., M. Kirkpatrick, and L. Excoffier. 2015. Expansion Load and the Evolutionary  
702 Dynamics of a Species Range. *Am Nat* 185:E81–E93.
- 703 Perrin, N., and J. Goudet. 2001. Inbreeding, kinship, and the evolution of natal dispersal. Pp.  
704 123–142 in J. Clobert, E. Danchin, A. A. Dhondt, and J. D. Nichols, eds. *Dispersal*. Oxford  
705 University Press, Oxford.
- 706 Perrin, N., and V. Mazalov. 1999. Dispersal and inbreeding avoidance. *Am Nat* 154:282–292.
- 707 Perrin, N., and V. Mazalov. 2000. Local competition, inbreeding, and the evolution of sex-biased  
708 dispersal. *Am Nat* 155:116–127.
- 709 Pike, V. L., C. K. Cornwallis, and A. S. Griffin. 2021. Why don't all animals avoid inbreeding?  
710 *Proceedings of the Royal Society B* 288:20211045.
- 711 Pizzari, T., and N. Wedell. 2013. The polyandry revolution. *Philosophical Transactions of the*  
712 *Royal Society B* 368:20120041.
- 713 Porcher, E., and R. Lande. 2016. Inbreeding depression under mixed outcrossing, self-  
714 fertilization and sib-mating. *BMC Evol Biol* 16:105.
- 715 Porcher, E., and R. Lande. 2005. Loss of gametophytic self-incompatibility with evolution of  
716 inbreeding depression. *Evolution* 59:46–60.
- 717 Power, D. J., and L. Holman. 2014. Polyandrous females found fitter populations. *J Evol Biol*  
718 27:1948–1955.
- 719 R Core Team. 2019. *R: A Language and Environment for Statistical Computing*. R Foundation  
720 for Statistical Computing, Vienna, Austria.
- 721 Rafajlović, M., A. Eriksson, A. Rimark, S. Hintz-Saltin, G. Charrier, M. Panova, C. André, K.  
722 Johannesson, and B. Mehlig. 2013. The Effect of Multiple Paternity on Genetic Diversity of  
723 Small Populations during and after Colonisation. *PLoS One* 8:1–9.
- 724 Rafter, M. A., G. A. McCulloch, G. J. Daghli, K. Gurdasani, and G. H. Walter. 2018. Polyandry,  
725 genetic diversity and fecundity of emigrating beetles: understanding new foci of infestation  
726 and selection. *J Pest Sci (2004)* 91:287–298.
- 727 Ravnigné, V., I. Olivieri, S. Gonzalez-Martinez, and F. Roussett. 2006. Selective Interactions  
728 Between Short-Distance Pollen and Seed Dispersal in Self-Compatible Species. *Evolution*  
729 60:2257–2271.

- 730 Reid, J. M., and P. Arcese. 2020. Recent immigrants alter the quantitative genetic architecture  
731 of paternity in song sparrows. *Evol Lett* 4:124–136.
- 732 Reid, J. M., P. Arcese, L. F. Keller, R. R. Germain, A. B. Duthie, S. Losdat, M. E. Wolak, and P.  
733 Nietlisbach. 2015. Quantifying inbreeding avoidance through extra-pair reproduction.  
734 *Evolution* 69:59–74.
- 735 Reid, J. M., and R. J. Sardell. 2012. Indirect selection on female extra-pair reproduction?  
736 Comparing the additive genetic value of maternal half-sib extra-pair and within-pair  
737 offspring. *Proceedings of the Royal Society B* 279:1700–8.
- 738 Rhains, M. 2017. Polyandry across Behavioral Classes in Female Spruce Budworm. *J Insect*  
739 *Behav* 30:662–673.
- 740 Ronce, O. 2007. How Does It Feel to Be Like a Rolling Stone? Ten Questions About Dispersal  
741 Evolution. *Annu Rev Ecol Evol Syst* 38:231–253.
- 742 Ronce, O., and J. Clobert. 2012. Dispersal syndrome. P. *in* J. Clobert, M. Baguette, T. G.  
743 Benton, and J. M. Bullock, eds. *Dispersal Ecology and Evolution*. Oxford University Press.
- 744 Roze, D., and F. Rousset. 2009. Strong effects of heterosis on the evolution of dispersal rates. *J*  
745 *Evol Biol* 22:1221–1233.
- 746 Schultz, S. T., and M. Lynch. 1997. Mutation and Extinction: The Role of Variable Mutational  
747 Effects, Synergistic Epistasis, Beneficial Mutations, and Degree of Outcrossing. *Evolution*  
748 51:1363–1371.
- 749 Shaw, A. K., and H. Kokko. 2015. Dispersal evolution in the presence of Allee effects can speed  
750 up or slow down invasions. *Am Nat* 185:631–639.
- 751 Simmons, M. J., and J. F. Crow. 1977. Mutations affecting fitness in *Drosophila* populations.  
752 *Annu Rev Genet* 11:49–78.
- 753 Slatyer, R. A., B. S. Mautz, P. R. Y. Backwell, and M. D. Jennions. 2012. Estimating genetic  
754 benefits of polyandry from experimental studies: a meta-analysis. *Biological Reviews* 87:1–  
755 33.
- 756 Spigler, R. B., K. Theodorou, and S.-M. Chang. 2017. Inbreeding depression and drift load in  
757 small populations at demographic disequilibrium. *Evolution* 71:81–94.
- 758 Stockley, P., J. B. Searle, D. W. MacDonald, and C. S. Jones. 1993. Female multiple mating  
759 behaviour in the common shrew as a strategy to reduce inbreeding. *Proceedings of the*  
760 *Royal Society B* 254:173–9.
- 761 Sun, S., and P. Cheptou. 2012. Life-history traits evolution across distribution ranges: how the  
762 joint evolution of dispersal and mating system favor the evolutionary stability of range  
763 limits? *Evol Ecol* 26:771–778.
- 764 Szulkin, M., and B. C. Sheldon. 2008. Dispersal as a means of inbreeding avoidance in a wild  
765 bird population. *Proceedings of the Royal Society B: Biological Sciences* 275:703–11.

- 766 Szulkin, M., K. Stopher, J. Pemberton, and J. Reid. 2013. Inbreeding avoidance, tolerance, or  
767 preference in animals? *Trends Ecol Evol* 28:205–211.
- 768 Taylor, M. L., T. A. R. Price, and N. Wedell. 2014. Polyandry in nature: a global analysis. *Trends*  
769 *Ecol Evol* 29:376–83.
- 770 Theodorou, K., and D. Couvet. 2006. On the expected relationship between inbreeding, fitness,  
771 and extinction. *Genetics Selection Evolution* 38:371–387.
- 772 Tregenza, T., and N. Wedell. 2002. Polyandrous females avoid costs of inbreeding. *Nature*  
773 415:71–73.
- 774 Waser, P., S. Austad, and B. Keane. 1986. When should animals tolerate inbreeding? *Am Nat*  
775 128:529–537.
- 776 Whitlock, M. C., P. K. Ingvarsson, and T. Hatfield. 2000. Local drift load and the heterosis of  
777 interconnected populations. *Heredity* 84:452–457.
- 778 Zhu, Y. O., M. L. Siegal, D. W. Hall, and D. a Petrov. 2014. Precise estimates of mutation rate  
779 and spectrum in yeast. *Proceedings of the National Academy of Sciences* 111:E2310–  
780 E2318.
- 781
- 782



783 **Inbreeding depression drives evolution of dispersal and polyandry**

784 **Supplementary Material**

785 Greta Bocedi<sup>1</sup>

786

787 <sup>1</sup>School of Biological Sciences, University of Aberdeen, Zoology Building, Tillydrone Avenue,  
788 Aberdeen, AB24 2TZ, UK.

789

790

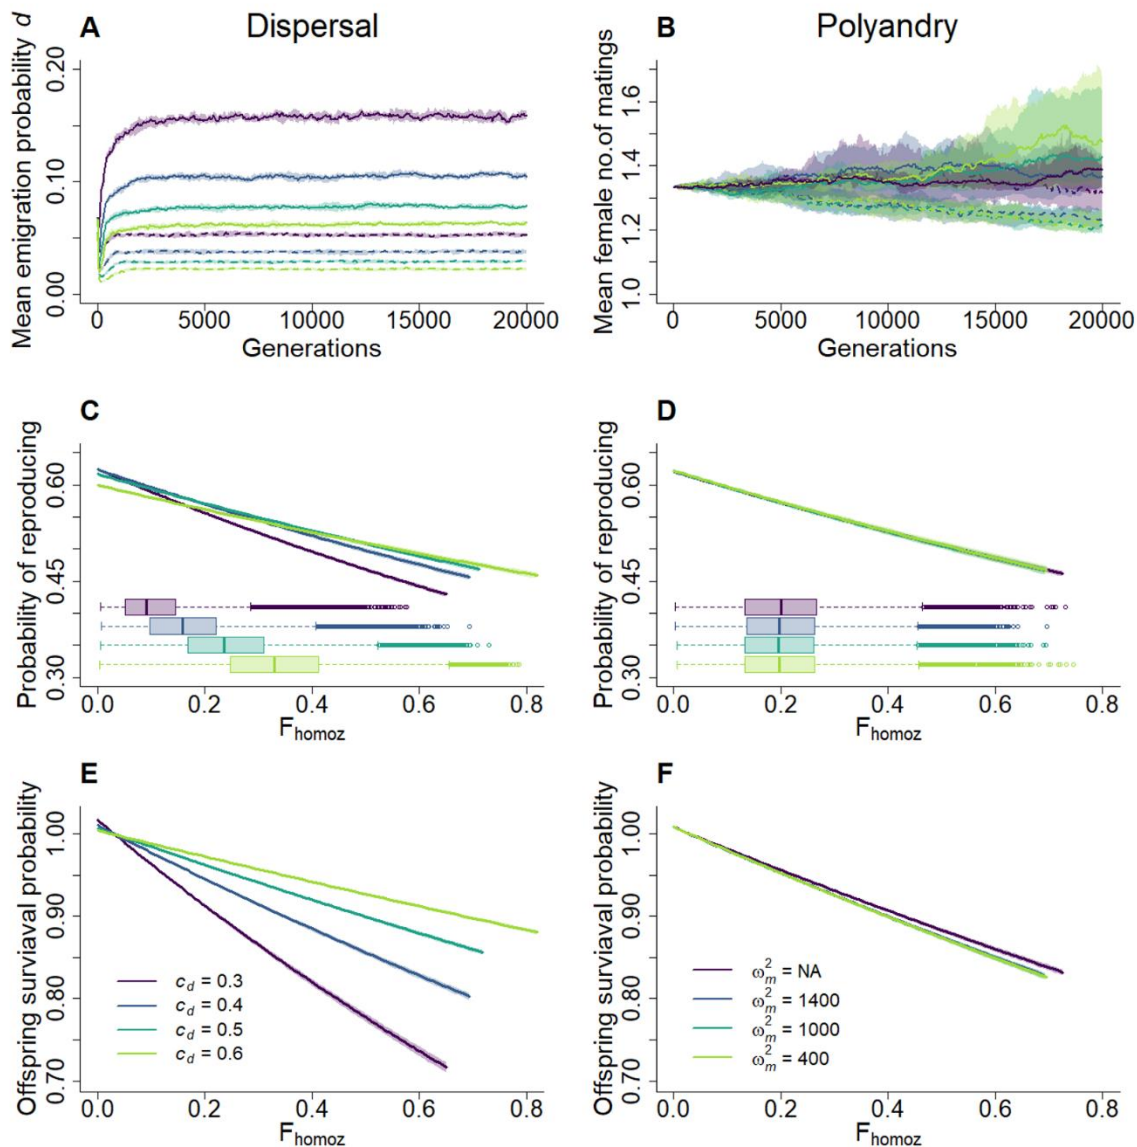

791

792 **Figure S1. Effect of lower rate of deleterious mutations ( $U_d = 0.5$ ;  $U_l = 0.1$ ) on the evolution**  
 793 **of dispersal and polyandry when either one or the other trait evolves. A)** Evolution of mean  
 794 dispersal probability phenotypes  $d$  in the absence of polyandry ( $a = 3.0$ ), under different costs of  
 795 dispersal ( $c_d = 0.3, 0.4, 0.5, 0.6$ ), in the absence (dashed lines) or presence (solid lines) of  
 796 deleterious mutations. **B)** Evolution of mean polyandry phenotypes (expected female number of  
 797 matings,  $P = 1 + 1/a$ ) evolved under fix dispersal probability ( $d = 0.05$ ), as a function of different  
 798 strengths of direct selection against female remating (no cost;  $\omega_m^2 = 1400, 1000, 400$ ) in the  
 799 absence (dashed lines) or presence (solid lines) of deleterious mutations. In A-B, lines represent  
 800 the median of mean phenotypes across 20 replicate simulations; colored shades depict the first  
 801 and third quartile. The color legend for panels A,C,E is presented in E; the legend for panels B,D,F

802 is presented in F. **C-D**) Relationship between individual probability of reproducing and inbreeding  
803 coefficient  $F_{homoz}$  (i.e., ID in reproduction probability) when **C**) dispersal evolves under different  
804 costs in the absence of polyandry and, **D**) polyandry evolves under different strengths of direct  
805 selection with fix dispersal probability. Lines show the fitted models and colored shades the 95%  
806 CI. Models are fitted at generation 20,000 to a subsample of 140 populations, across 10  
807 replicates. Boxplots represents the distribution of the individual  $F_{homoz}$ . **E-F**) Relationship between  
808 offspring survival probability and  $F_{homoz}$  (i.e., ID in offspring survival probability). In E simulation  
809 scenarios and parameters as in C; in F as in D.

810

811

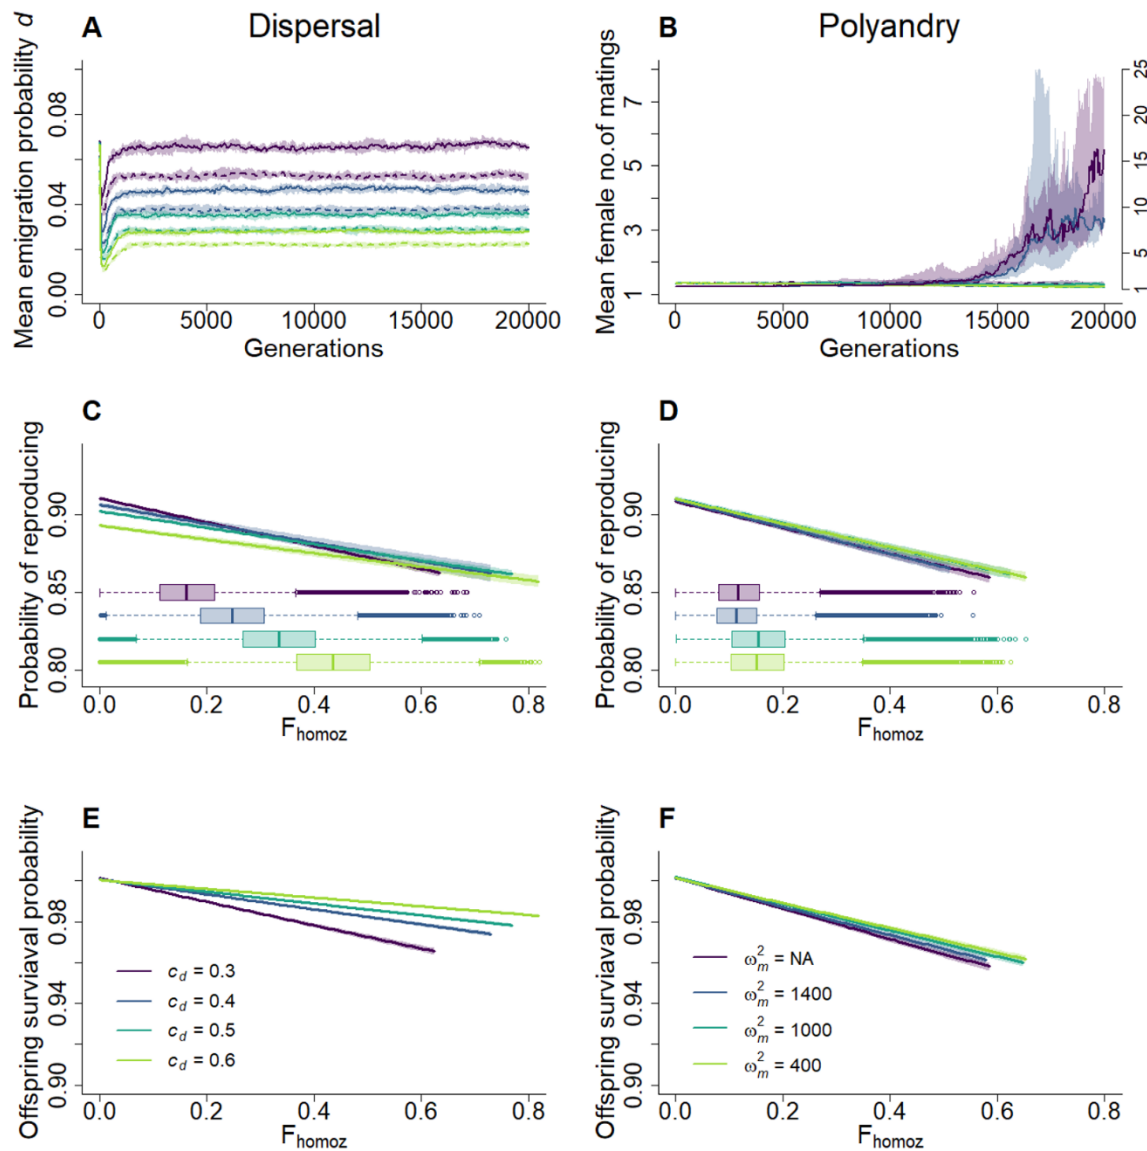

812

813 **Figure S2.** Effect of very low rate of deleterious mutations ( $U_d = 0.1$ ;  $U_l = 0.02$ ) on the evolution  
 814 of dispersal and polyandry when either one or the other trait evolves. A) Evolution of mean  
 815 dispersal probability phenotypes  $d$  in the absence of polyandry ( $a = 3.0$ ), under different costs of  
 816 dispersal ( $c_d = 0.3, 0.4, 0.5, 0.6$ ), in the absence (dashed lines) or presence (solid lines) of  
 817 deleterious mutations. B) Evolution of mean polyandry phenotypes (expected female number of  
 818 matings,  $P = 1 + 1/a$ ) evolved under fix dispersal probability ( $d = 0.05$ ), as a function of different  
 819 strengths of direct selection against female remating (no cost;  $\omega_m^2 = 1400, 1000, 400$ ) in the  
 820 absence (dashed lines) or presence (solid lines) of deleterious mutations. In A-B, lines represent  
 821 the median of mean phenotypes across 20 replicated simulations; colored shades depict the first  
 822 and third quartile. The color legend for panels A,C,E is presented in E; the legend for panels B,D,F  
 823 is presented in F. C-D) Relationship between individual probability of reproducing and inbreeding

824 coefficient  $F_{homoz}$  (i.e., ID in reproduction probability) when C) dispersal evolves under different  
 825 costs in the absence of polyandry and, D) polyandry evolves under different strengths of direct  
 826 selection with fix dispersal probability. Lines show the fitted models and colored shades the 95%  
 827 CI. Models are fitted at generation 20,000 to a subsample of 140 populations, across 10  
 828 replicates. Boxplots represents the distribution of the individual  $F_{homoz}$ . E-F) Relationship between  
 829 offspring survival probability and  $F_{homoz}$  (i.e., ID in offspring survival probability). In E simulation  
 830 scenarios and parameters as in C; in F as in D.

831

832

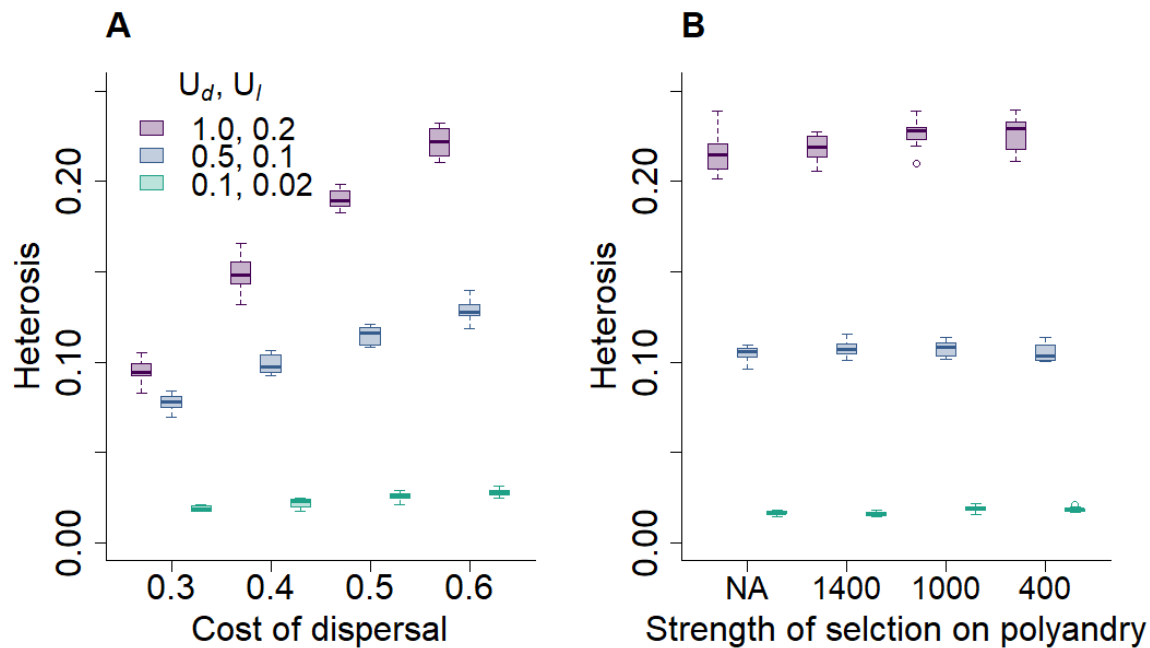

833

834 **Figure S3.** Heterosis emerging when either dispersal or polyandry evolve under different rates of  
 835 deleterious mutations. A) Heterosis as a function of cost of dispersal  $c_d$  and different rates of  
 836 mildly deleterious ( $U_d$ ) and lethal ( $U_l$ ) mutations (colors), when only dispersal is evolving in the  
 837 absence of polyandry. B) Heterosis as a function of the strength of direct selection against  
 838 polyandry  $\omega_m^2$  and different rates deleterious mutations, when only polyandry is evolving under fix  
 839 dispersal probability ( $d = 0.05$ ). Heterosis is shown as median (solid bands), first and third  
 840 quartiles (box limits), and approximately twice the standard deviation (whiskers) over 20 replicate  
 841 simulations at generation 20,000.

842

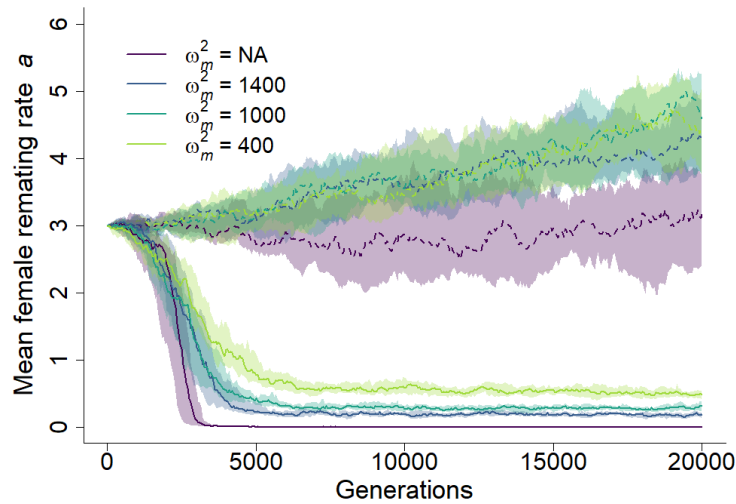

843

844 **Figure S4. Evolution of female re-mating rate  $a$  under fix dispersal.** Evolution of mean female  
845 remating rate phenotypes ( $a$ ) under fix dispersal probability ( $d = 0.05$ ), as a function of different  
846 strengths of direct selection against female remating (no cost;  $\omega_m^2 = 1400, 1000, 400$ ) in the  
847 absence (dashed lines) or presence (solid lines) of deleterious mutations. Lines represent the  
848 median of mean phenotypes across 20 replicated simulations; colored shades depict the first and  
849 third quartile. Other parameters:  $U_d = 1.0$ ;  $U_l = 0.2$ .

850

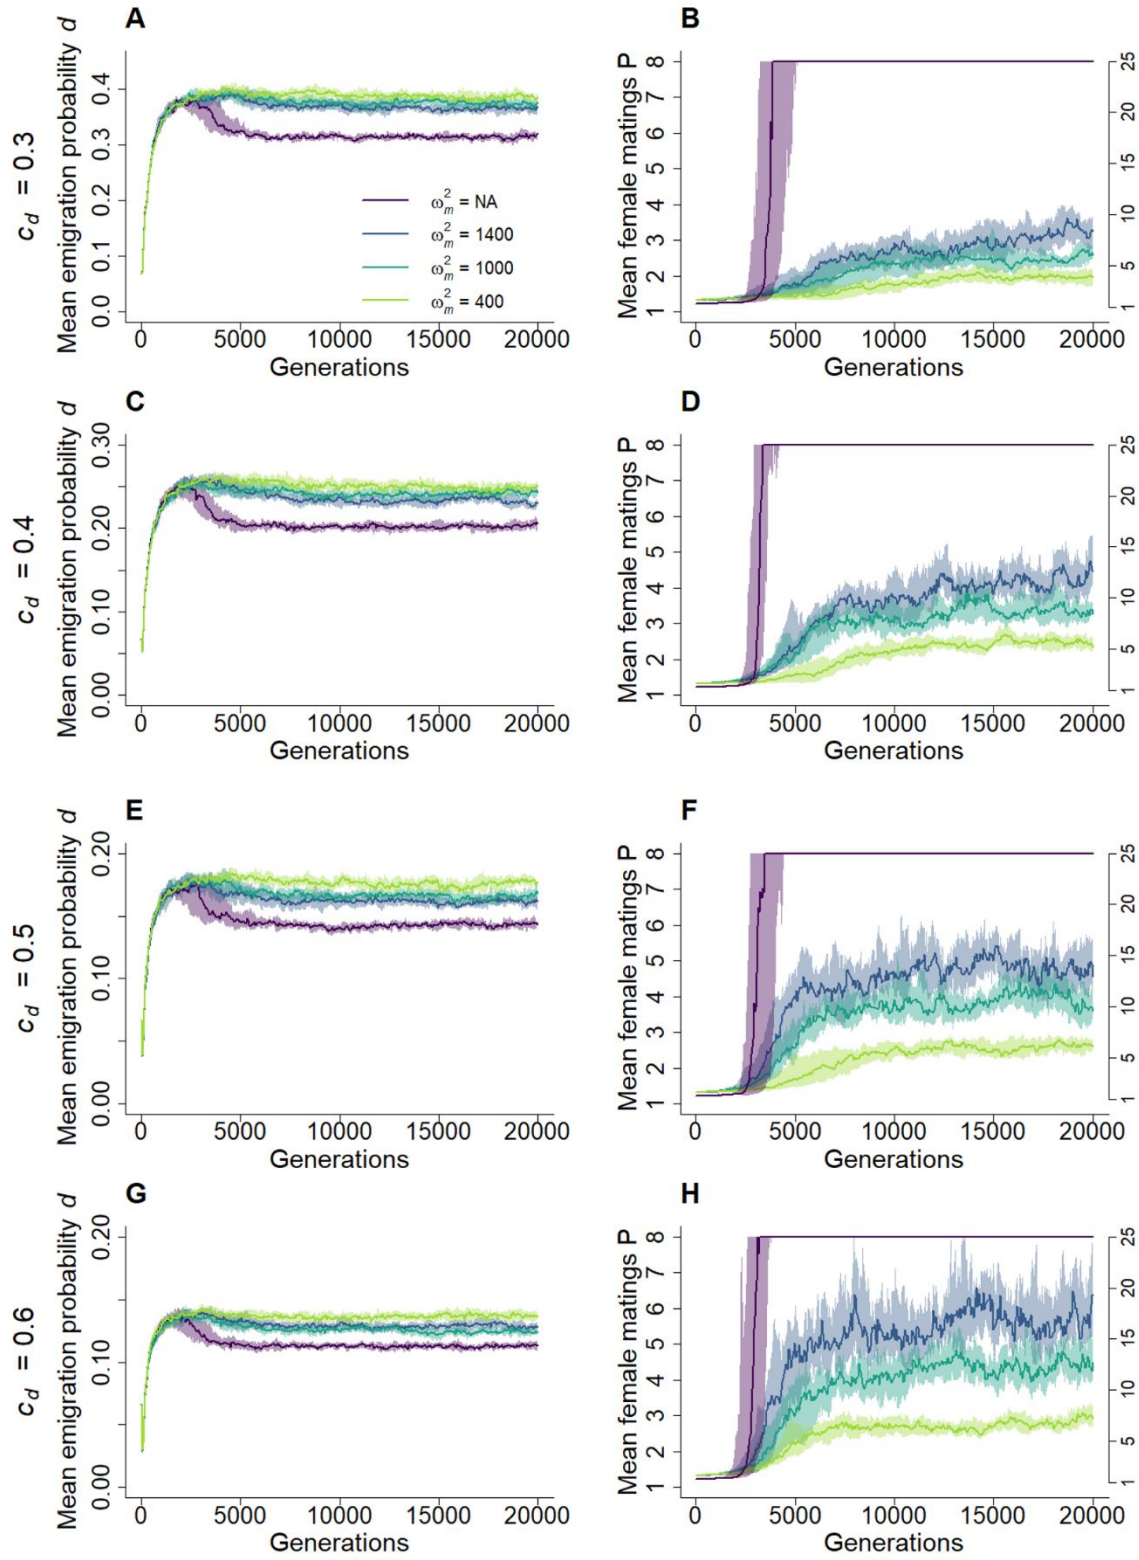

851

852 **Figure S5 (previous page). Evolutionary dynamics of dispersal and polyandry.** Joint  
853 evolution of mean dispersal probability phenotypes ( $d$ ) and mean polyandry phenotypes (expect  
854 female number of matings:  $P = 1 + 1/a$ ) in the presence of deleterious mutation, given different  
855 costs of dispersal  $c_d$  (**A-B**: 0.3; **C-D**: 0.4; **E-F**: 0.5; **G-H**: 0.6) and different strengths of direct  
856 selection against female re-mating (no cost;  $\omega_m^2 = 1400, 1000, 400$ , depicted by different colors).  
857 In the absence of direct selection against polyandry ( $\omega_m^2 = \text{NA}$ ), females evolved to mate with all  
858 the males in the population; the y-axis on the right hand-side refers to this single line (purple).  
859 Lines represent the median of mean phenotypes across 20 replicated simulations; colored shades  
860 depict the first and third quartile.  
861



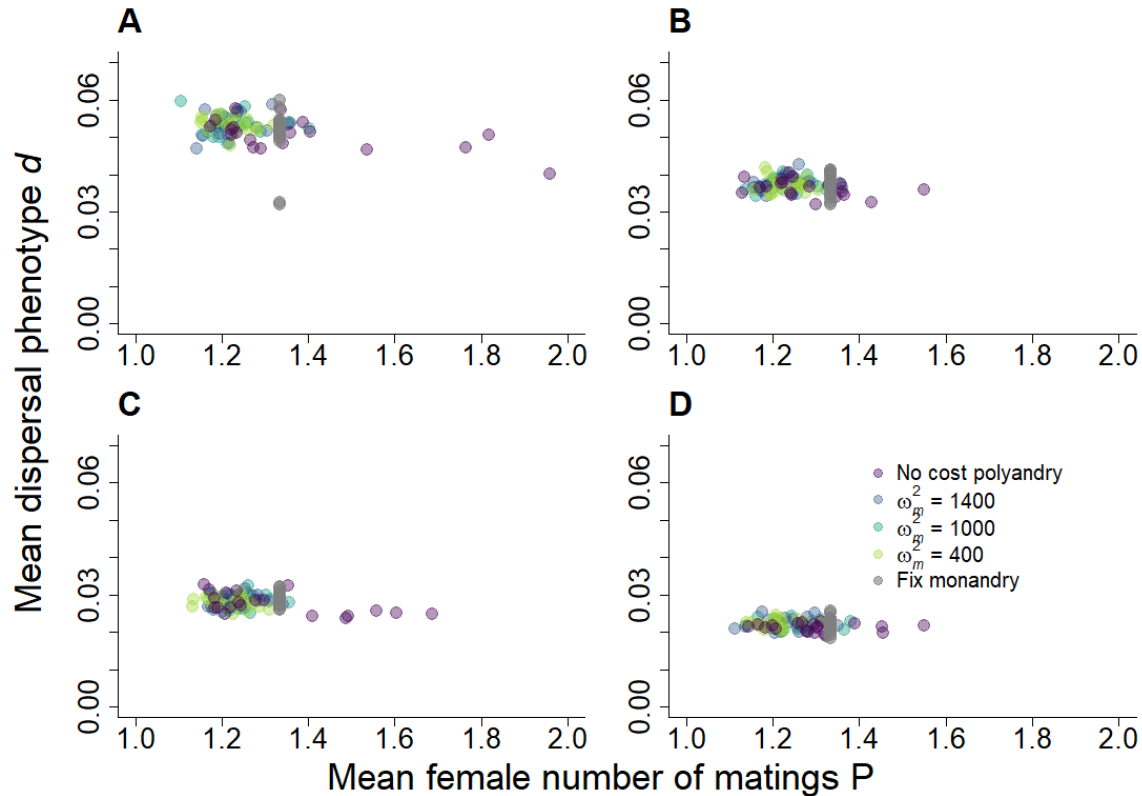

862

863 **Figure S6. Joint evolution of dispersal and polyandry in the absence of inbreeding**  
864 **depression.** Mean dispersal probability phenotypes ( $d$ ) and mean polyandry phenotypes  
865 (expected female number of matings:  $P = 1 + 1/a$ ) in the absence of deleterious mutations, given  
866 different costs of dispersal  $c_d$  (**A**: 0.3; **B**: 0.4; **C**: 0.5; **D**: 0.6) and different strengths of direct  
867 selection against female re-mating (no cost;  $\omega_m^2 = 1400, 1000, 400$ ). Each data point represents  
868 the mean phenotypic values for one out of 20 replicate simulations at generation 20,000. Colored  
869 dots indicate simulations where dispersal and polyandry jointly evolved; grey dots, simulations  
870 where dispersal evolved given fix monandry ( $a = 3.0$ ).

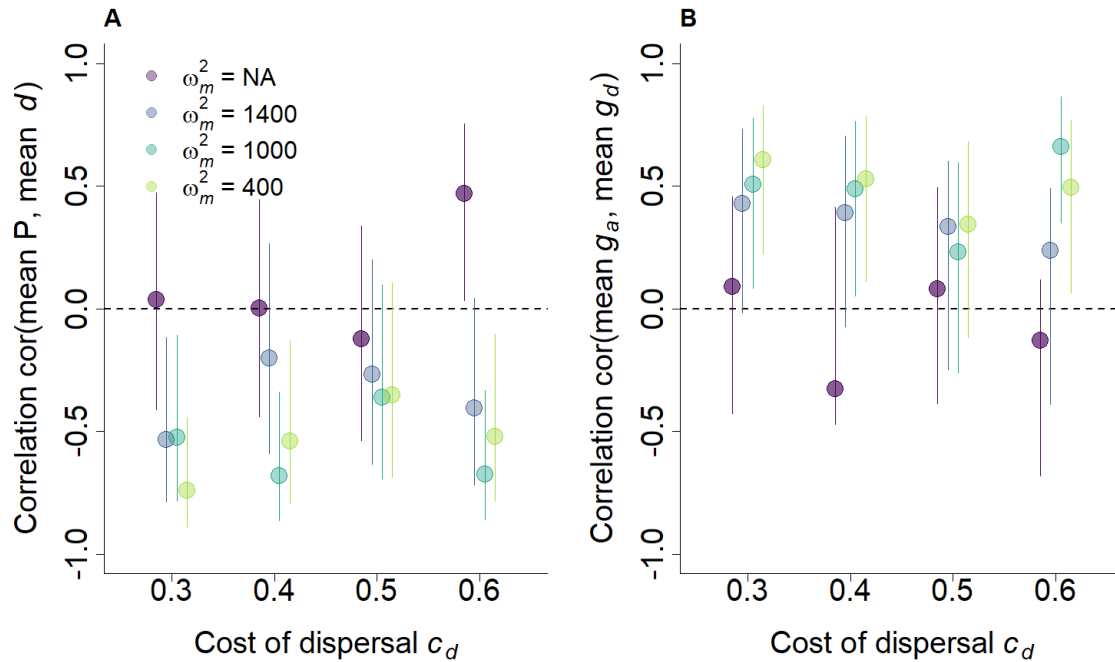

871

872 **Figure S7. Correlation between polyandry and dispersal at the metapopulation level. A)**

873 Correlation between mean polyandry phenotype ( $P = 1 + 1/a$ ) and mean dispersal phenotype ( $d$ ,

874 and **B**) correlation between mean genotypic female re-mating rate ( $g_a$ ) and mean genotypic

875 dispersal ( $g_d$ ), given different costs of dispersal  $c_d$  and different strengths of direct selection

876 against female re-mating (no cost;  $\omega_m^2 = 1400, 1000, 400$ ). Correlations are calculated across 20

877 replicate simulations between each replicate mean phenotypic and genotypic values. Means are

878 calculated across all individuals in the metapopulation and over the last 500 generations. Bars

879 represents the 95% confidence intervals.

880

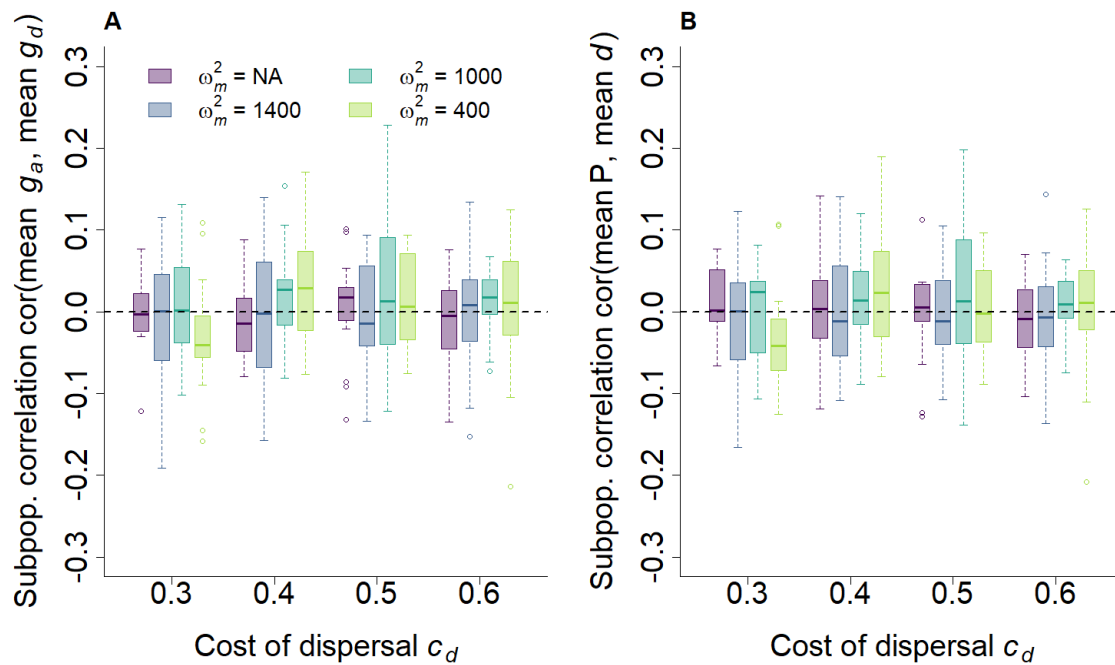

881

882 **Figure S8. Absence of between subpopulation correlation between polyandry and**  
883 **dispersal. A)** Correlation between mean genotypic female re-mating rate ( $g_a$ ) and mean  
884 genotypic dispersal ( $g_d$ ), and **B)** between mean polyandry phenotype ( $P = 1 + 1/a$ ) and mean  
885 dispersal phenotype ( $d$ ), given different costs of dispersal  $c_d$  and different strengths of direct  
886 selection against female re-mating (no cost;  $\omega_m^2 = 1400, 1000, 400$ ). Correlations are calculated  
887 for each replicate across subpopulations mean phenotypic and genotypic values at generation  
888 20,000. Means are calculated across all individuals in each subpopulation. Correlations are  
889 shown as median (solid bands), first and third quartiles (box limits), and approximately twice the  
890 standard deviation (whiskers) over 20 replicate simulations.

891

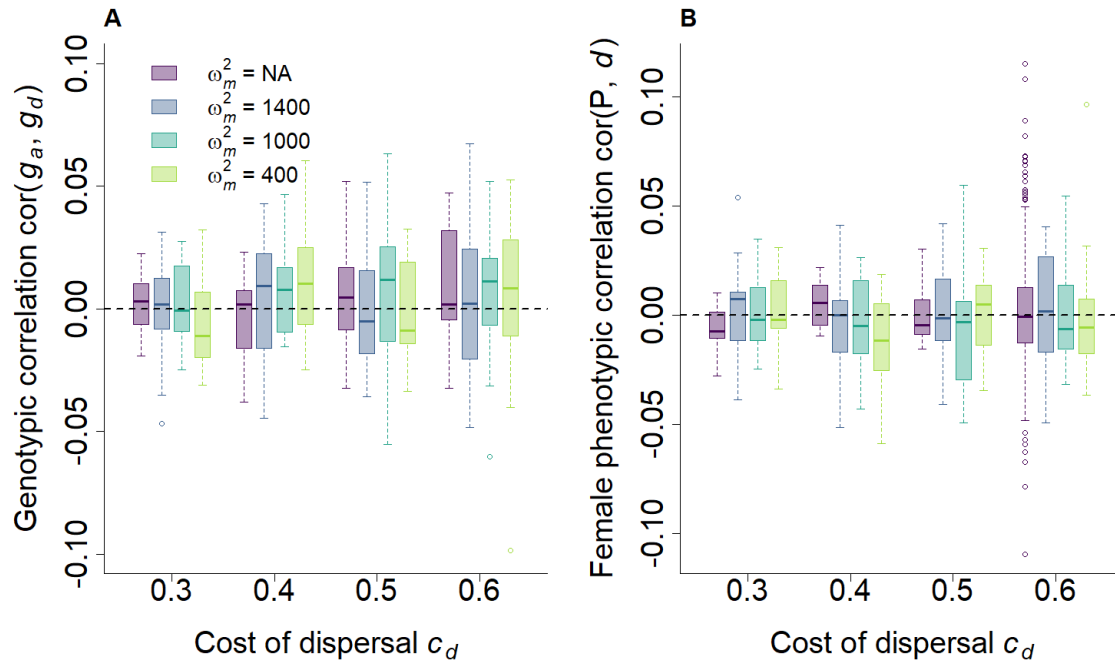

892

893 **Figure S9. Absence of genetic correlation between polyandry and dispersal. A)** Genetic  
894 correlation between female re-mating rate genotypic value ( $g_a$ ) and dispersal genotypic value ( $g_d$ ),  
895 and **B)** genetic correlation between female polyandry phenotype ( $P = 1 + 1/a$ ) and female  
896 dispersal phenotype ( $d$ ), given different costs of dispersal  $c_d$  and different strengths of direct  
897 selection against female re-mating (no cost;  $\omega_m^2 = 1400, 1000, 400$ ). Correlations are calculated  
898 for each replicate across individuals phenotypic and genotypic values at generation 20,000, and  
899 are shown as median (solid bands), first and third quartiles (box limits), and approximately twice  
900 the standard deviation (whiskers) over 20 replicate simulations.

901

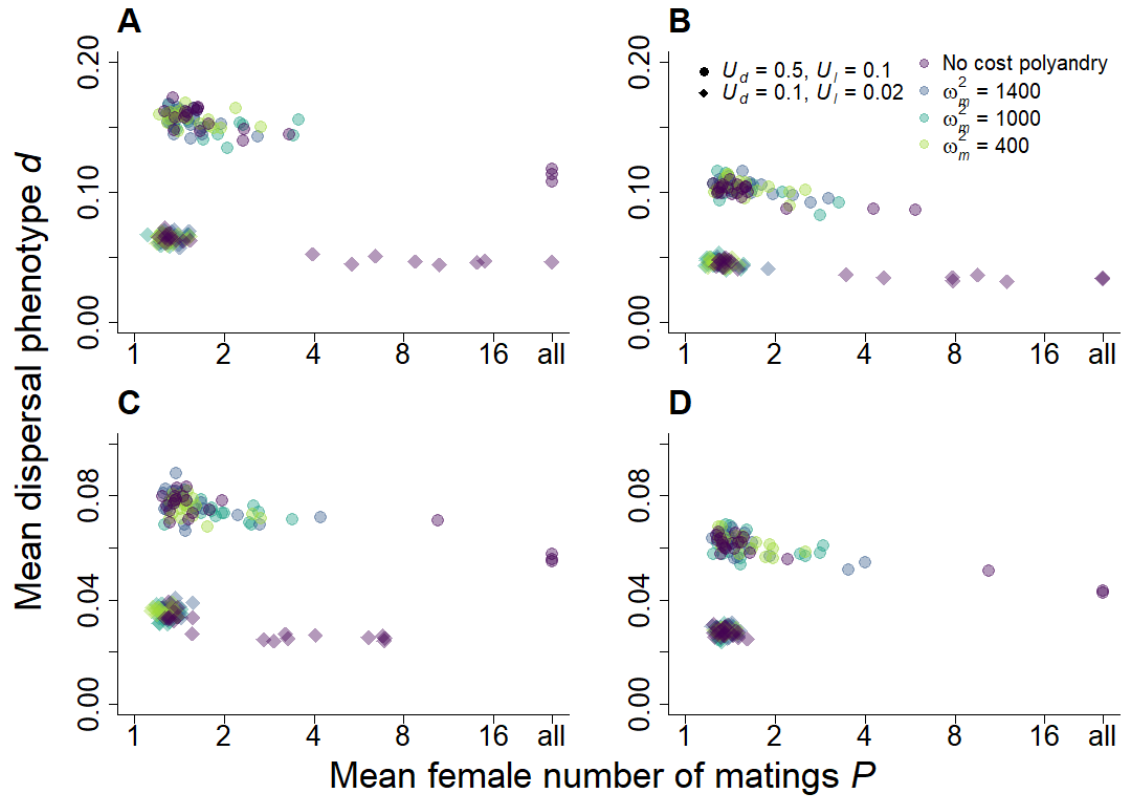

902

903 **Figure S10. Effect of lower deleterious mutation rate on the joint evolution of dispersal and**  
 904 **polyandry.** Joint evolution of mean dispersal probability phenotypes ( $d$ ) and mean polyandry  
 905 phenotypes (expect female number of matings:  $P = 1 + 1/a$ ) at two different levels of deleterious  
 906 mutation rates, given different costs of dispersal  $c_d$  (**A**: 0.3; **B**: 0.4; **C**: 0.5; **D**: 0.6) and different  
 907 strengths of direct selection against female re-mating (no cost;  $\omega_m^2 = 1400, 1000, 400$ ). Dots  
 908 represent simulations where  $U_d = 0.5$  and  $U_l = 0.1$ , while diamonds represent simulations where  
 909  $U_d = 0.1$  and  $U_l = 0.02$ , thus corresponding to mutation rates that are half and a tenth, respectively,  
 910 of the mutation rates presented in the main results (Fig. 2). Each data point represents the mean  
 911 phenotypic value for one out of 20 replicate simulations at generation 20,000. The x-axis is on the  
 912 logarithmic scale to aid visualization.

913

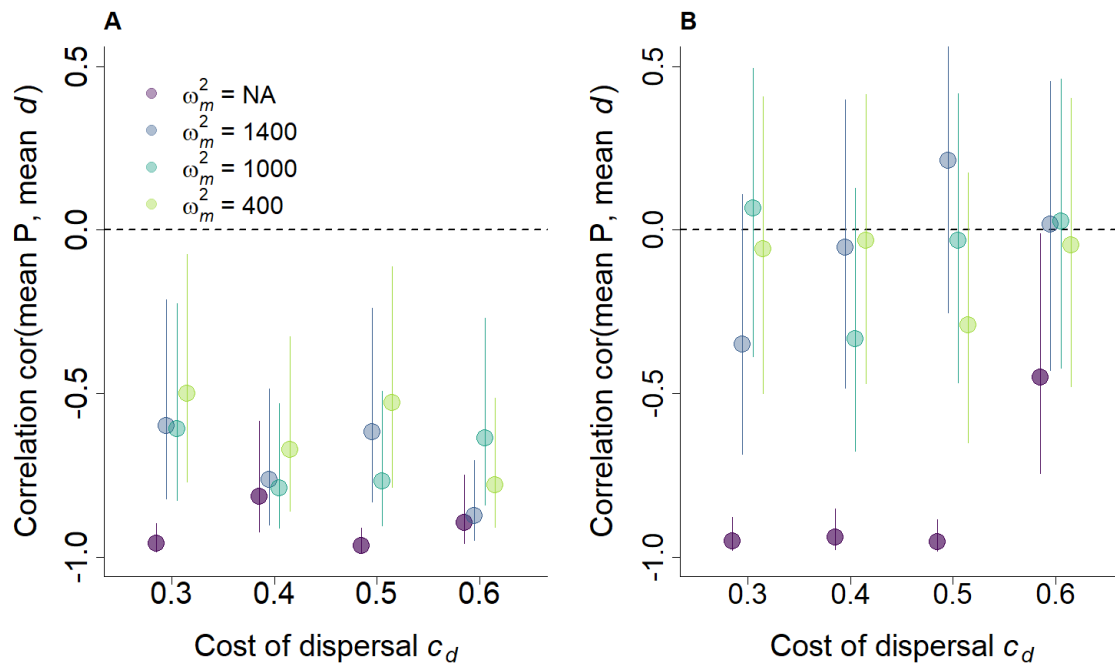

914

915 **Figure S11. Correlation between polyandry and dispersal at the metapopulation level for**  
916 **lower rates of deleterious mutations.** Correlation between mean polyandry phenotype ( $P = 1$   
917  $+ 1/a$ ) and mean dispersal phenotype ( $d$ ) given **A)**  $U_d = 0.5$  and  $U_l = 0.1$ , and **B)**  $U_d = 0.1$  and  $U_l$   
918  $= 0.02$ . Results are presented for different costs of dispersal  $c_d$  and different strengths of direct  
919 selection against female re-mating (no cost;  $\omega_m^2 = 1400, 1000, 400$ ). Correlations are calculated  
920 across 20 replicate simulations between each replicate mean phenotypic and genotypic values.  
921 Means are calculated across all individuals in the metapopulation and over the last 500  
922 generations. Bars represents the 95% confidence intervals.

923

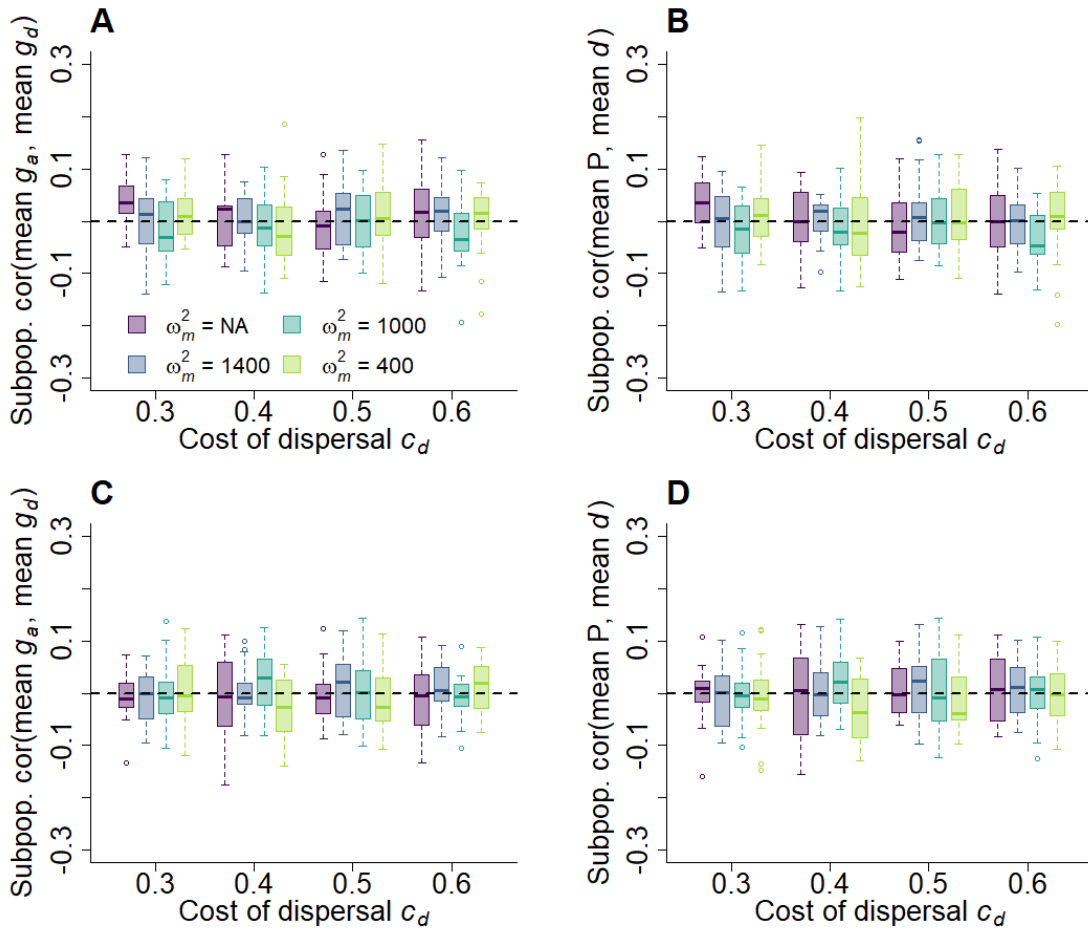

924

925 **Figure S12. Correlation between polyandry and dispersal at the subpopulation level for**  
926 **lower rates of deleterious mutations. A)** Correlation between mean genotypic female re-mating  
927 rate ( $g_a$ ) and mean genotypic dispersal ( $g_d$ ), and **B)** between mean polyandry phenotype ( $P = 1 +$   
928  $1/a$ ) and mean dispersal phenotype ( $d$ ), given different costs of dispersal  $c_d$  and different strengths  
929 of direct selection against female re-mating (no cost;  $\omega_m^2 = 1400, 1000, 400$ ), when mutation rates  
930  $U_d = 0.5$  and  $U_l = 0.1$ . **C-D)** same as A-B, but when  $U_d = 0.1$  and  $U_l = 0.02$ . Correlations are  
931 calculated for each replicate across subpopulations mean phenotypic and genotypic values at  
932 generation 20,000. Means are calculated across all individuals in each subpopulation.  
933 Correlations are shown as median (solid bands), first and third quartiles (box limits), and  
934 approximately twice the standard deviation (whiskers) over 20 replicate simulations.

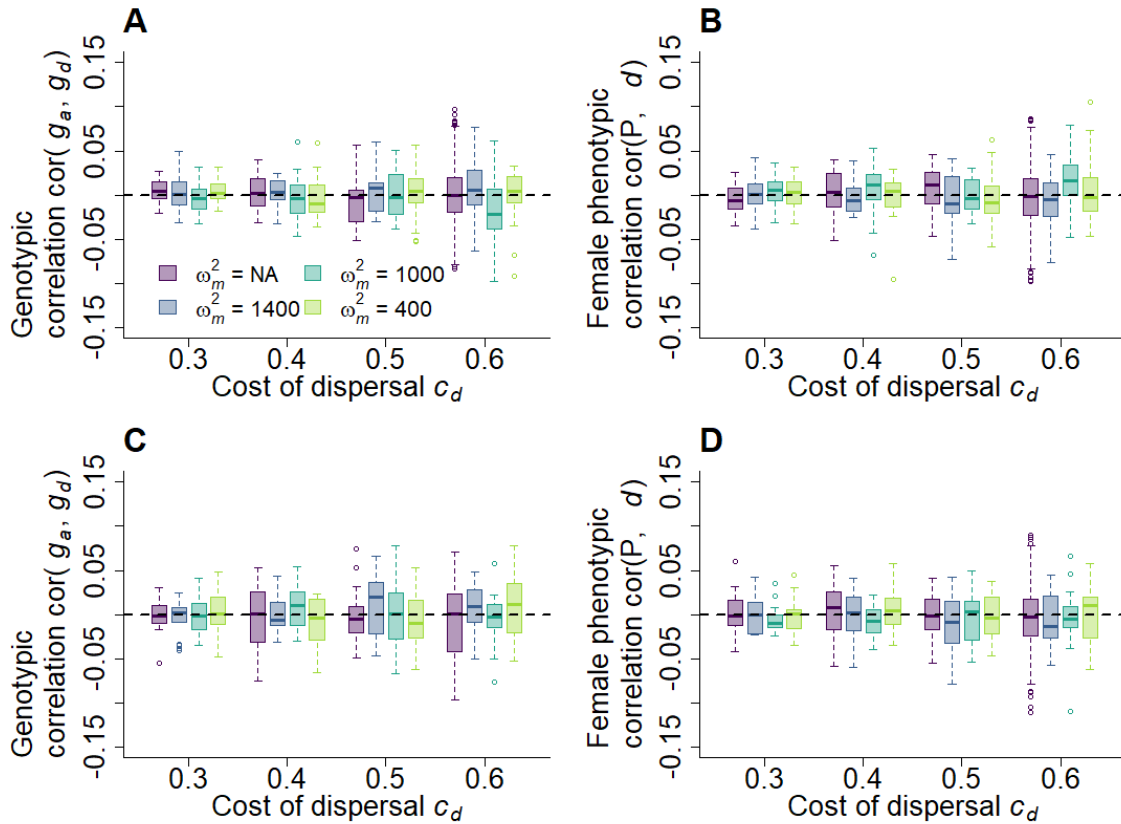

935

936 **Figure S13. Genetic correlation between polyandry and dispersal for lower rates of**  
 937 **deleterious mutations. A)** Genetic correlation between female re-mating rate genotypic value  
 938 ( $g_a$ ) and dispersal genotypic value ( $g_d$ ), and **B)** genetic correlation between female polyandry  
 939 phenotype ( $P = 1 + 1/a$ ) and female dispersal phenotype ( $d$ ), given different costs of dispersal  $c_d$   
 940 and different strengths of direct selection against female re-mating (no cost;  $\omega_m^2 = 1400, 1000,$   
 941  $400$ ), when mutation rates  $U_d = 0.5$  and  $U_l = 0.1$ . **C-D)** same as A-B, but when  $U_d = 0.1$  and  $U_l =$   
 942  $0.02$ . Correlations are calculated for each replicate across individuals phenotypic and genotypic  
 943 values at generation 20,000, and are shown as median (solid bands), first and third quartiles (box  
 944 limits), and approximately twice the standard deviation (whiskers) over 20 replicate simulations.

945



946 **Table S1.** Model variables and parameters.

| <b>Variables</b>                            | <b>Description</b>                                                               | <b>Parameter values</b>                          |
|---------------------------------------------|----------------------------------------------------------------------------------|--------------------------------------------------|
| $K$                                         | Carrying capacity per cell (sub-population)                                      | 50 individuals                                   |
| $f$                                         | Female fecundity                                                                 | 12                                               |
| <b>Inbreeding and inbreeding depression</b> |                                                                                  |                                                  |
| $R$                                         | Genome map length (for the continuous chromosome carrying deleterious mutations) | 10                                               |
| $s$                                         | Selection coefficient of mildly deleterious mutations                            | $\Gamma(\alpha, S_d/\alpha)$                     |
| $h$                                         | Dominance coefficient of mildly deleterious mutations                            | $U[0.0, e^{-ks}]$                                |
| $S_d$                                       | Mean selection coefficient of mildly deleterious mutations                       | 0.05                                             |
| $h_d$                                       | Mean dominance coefficient of mildly deleterious mutations                       | 0.3                                              |
| $\alpha$                                    | Shape parameter of gamma distribution of $s$                                     | 1.0                                              |
| $k$                                         | Constant                                                                         | $-\log(2h_d)/s_d$                                |
| $s_l$                                       | Selection coefficient of lethal mutations                                        | 1.0                                              |
| $h_l$                                       | Dominance coefficient of lethal mutations                                        | 0.02                                             |
| $U_d$                                       | Mutation rate for mildly deleterious mutations                                   | $1^1, 0.5, 0.1$ / diploid genome / generation    |
| $U_l$                                       | Mutation rate for lethal mutations                                               | $0.2^*, 0.1, 0.02$ / diploid genome / generation |
| $L_n$                                       | Number of neutral diploid loci                                                   | 500                                              |
|                                             | Neutral allelic values                                                           | $U[-1000.0, 1000.0]$                             |
| $F_{\text{homoz}}$                          | Individual neutral homozygosity (proxy for inbreeding coefficient)               |                                                  |
| $r$                                         | Recombination rate for neutral loci                                              | 0.1                                              |
| $\mu_n$                                     | Mutation probability for neutral alleles                                         | 0.001 / haploid locus / generation               |
| <b>Traits</b>                               |                                                                                  |                                                  |
| $L$                                         | Number of diploid loci for each trait                                            | 1                                                |
| $a$                                         | Female re-mating interval (phenotypic value)                                     | $a \geq 0.0$                                     |
| $d$                                         | Emigration probability (phenotypic value)                                        | $0.0 \leq d \leq 1.0$                            |
|                                             | Initial genotypic mean for female re-mating rate                                 | 3.0                                              |

<sup>1</sup> Values used in the simulations presented in the main text.

|                  |                                                             |                                    |
|------------------|-------------------------------------------------------------|------------------------------------|
|                  | Initial genotypic mean for emigration probability           | 0.05                               |
| $\sigma^2_{a,0}$ | Initial genotypic variance for female re-mating rate        | 0.25                               |
| $\sigma^2_{d,0}$ | Initial genotypic variance for emigration probability       | 0.1                                |
| $\mu$            | Mutation probability                                        | 0.001 / haploid locus / generation |
|                  | Mutational effects                                          | $N(0.0, 0.07)$                     |
| <hr/>            |                                                             |                                    |
| <b>Costs</b>     |                                                             |                                    |
| $\omega^2_m$     | Strength of direct selection against female multiple mating | no cost, 1400, 1000, 400           |
| $c_d$            | Cost of dispersal                                           | 0.3, 0.4, 0.5, 0.6                 |
| <hr/>            |                                                             |                                    |

947

948 **Table S2.** Coefficients (i.e., mutation load  $\beta_0$ , and inbreeding load  $\beta_1$ ) and relative standard errors  
 949 of the relationship between individual probability of reproducing and inbreeding coefficient  $F_{homoz}$ ,  
 950 and between offspring survival probability and  $F_{homoz}$ . Results are presented for simulations where  
 951 dispersal evolves under different costs ( $c_d$ ), in the absence of polyandry, and where polyandry  
 952 evolves under different strengths of direct selection ( $\omega_m^2$ ), with fix dispersal probability. Models  
 953 are fitted at generation 20,000 to a subsample of 140 populations, across 10 replicates.

| <i>Probability of reproducing</i> |           |       |           |       | <i>Offspring survival</i> |        |           |       |
|-----------------------------------|-----------|-------|-----------|-------|---------------------------|--------|-----------|-------|
| <b>Only dispersal evolving</b>    |           |       |           |       |                           |        |           |       |
| $C_d$                             | $\beta_0$ | SE    | $\beta_1$ | SE    | $\beta_0$                 | SE     | $\beta_1$ | SE    |
| <b>0.3</b>                        | -0.99     | 0.005 | -1.34     | 0.016 | 0.11                      | 0.001  | -1.97     | 0.025 |
| <b>0.4</b>                        | -0.94     | 0.003 | -1.16     | 0.018 | 0.07                      | 0.001  | -1.29     | 0.014 |
| <b>0.5</b>                        | -0.92     | 0.005 | -0.98     | 0.016 | 0.04                      | 0.001  | -0.78     | 0.008 |
| <b>0.6</b>                        | -0.92     | 0.002 | -0.79     | 0.014 | 0.02                      | 0.0004 | -0.52     | 0.005 |
| <b>Only polyandry evolving</b>    |           |       |           |       |                           |        |           |       |
| $\omega_m^2$                      | $\beta_0$ | SE    | $\beta_1$ | SE    | $\beta_0$                 | SE     | $\beta_1$ | SE    |
| <b>none</b>                       | -0.94     | 0.004 | -0.81     | 0.007 | 0.02                      | 0.0003 | -0.49     | 0.005 |
| <b>1400</b>                       | -0.94     | 0.003 | -0.79     | 0.014 | 0.02                      | 0.0003 | -0.46     | 0.005 |
| <b>1000</b>                       | -0.94     | 0.003 | -0.78     | 0.009 | 0.02                      | 0.0003 | -0.46     | 0.005 |
| <b>400</b>                        | -0.94     | 0.003 | -0.77     | 0.009 | 0.02                      | 0.0003 | -0.46     | 0.005 |

954

955 **Table S3. Jointly evolving dispersal and polyandry affect evolution of inbreeding**  
 956 **depression in reproduction and survival.** Coefficients (i.e., mutation load  $\beta_0$ , and inbreeding  
 957 load  $\beta_1$ ) and relative standard errors of the relationship between individual probability of  
 958 reproducing and inbreeding coefficient  $F_{homoz}$ , and between offspring survival probability and  
 959  $F_{homoz}$ , when dispersal and polyandry are jointly evolving. Results are presented for varying costs  
 960 of dispersal ( $c_d$ ) and strengths of direct selection against female multiple mating ( $\omega_m^2$ ). Models are  
 961 fitted at generation 20,000 to a subsample of 140 populations, across 10 replicates.

962

| $C_d$      | $\omega_m^2$ | <i>Probability of reproduction</i> |       |           |       | <i>Survival probability</i> |        |           |       |
|------------|--------------|------------------------------------|-------|-----------|-------|-----------------------------|--------|-----------|-------|
|            |              | $\beta_0$                          | SE    | $\beta_1$ | SE    | $\beta_0$                   | SE     | $\beta_1$ | SE    |
| <b>0.3</b> | <b>none</b>  | -0.99                              | 0.003 | -1.29     | 0.024 | 0.07                        | 0.001  | -1.74     | 0.023 |
|            | <b>1400</b>  | -0.99                              | 0.002 | -1.35     | 0.022 | 0.09                        | 0.001  | -1.90     | 0.024 |
|            | <b>1000</b>  | -0.99                              | 0.003 | -1.34     | 0.020 | 0.09                        | 0.001  | -1.86     | 0.024 |
|            | <b>400</b>   | -0.99                              | 0.004 | -1.35     | 0.017 | 0.09                        | 0.001  | -1.87     | 0.024 |
| <b>0.4</b> | <b>none</b>  | -0.95                              | 0.003 | -1.09     | 0.035 | 0.04                        | 0.001  | -1.10     | 0.013 |
|            | <b>1400</b>  | -0.95                              | 0.001 | -1.14     | 0.016 | 0.05                        | 0.001  | -1.20     | 0.014 |
|            | <b>1000</b>  | -0.95                              | 0.004 | -1.17     | 0.014 | 0.05                        | 0.001  | -1.22     | 0.014 |
|            | <b>400</b>   | -0.95                              | 0.002 | -1.17     | 0.019 | 0.06                        | 0.001  | -1.20     | 0.014 |
| <b>0.5</b> | <b>none</b>  | -0.94                              | 0.003 | -0.93     | 0.014 | 0.03                        | 0.0004 | -0.72     | 0.008 |
|            | <b>1400</b>  | -0.93                              | 0.002 | -0.96     | 0.018 | 0.03                        | 0.0004 | -0.76     | 0.008 |
|            | <b>1000</b>  | -0.93                              | 0.003 | -0.91     | 0.013 | 0.03                        | 0.0004 | -0.74     | 0.008 |
|            | <b>400</b>   | -0.93                              | 0.003 | -0.99     | 0.011 | 0.04                        | 0.0005 | -0.78     | 0.008 |
| <b>0.6</b> | <b>none</b>  | -0.94                              | 0.002 | -0.77     | 0.012 | 0.02                        | 0.0003 | -0.46     | 0.005 |
|            | <b>1400</b>  | -0.93                              | 0.001 | -0.80     | 0.012 | 0.02                        | 0.0003 | -0.50     | 0.005 |
|            | <b>1000</b>  | -0.94                              | 0.003 | -0.80     | 0.012 | 0.02                        | 0.0003 | -0.49     | 0.005 |
|            | <b>400</b>   | -0.93                              | 0.004 | -0.80     | 0.011 | 0.03                        | 0.0003 | -0.52     | 0.006 |

963

964

965
